# Supplementary material for: Active eukaryotes in drinking water distribution systems of ground and surface waterworks
Source: PubMed Central journal article supplement (PMC6610866; doi:10.1186/s40168-019-0715-5), 2019-07-03
Supplement: 40168_2019_715_MOESM3_ESM.pdf [file 40168_2019_715_MOESM3_ESM.pdf]

**Table S3.** Number of reads in the analysed 18S rRNA gene (rDNA) and rRNA transcript (rRNA) sequence libraries.

| Sample type             | DWDS* | Location:<br>Distance from   | Season**                                      | Sampling event details                   | DNA          |              |               |           |           | RNA          |              |               |           |           |
|-------------------------|-------|------------------------------|-----------------------------------------------|------------------------------------------|--------------|--------------|---------------|-----------|-----------|--------------|--------------|---------------|-----------|-----------|
|                         |       |                              |                                               |                                          | N (analysed) | N (excluded) | Average reads | Min reads | Max reads | N (analysed) | N (excluded) | Average reads | Min reads | Max reads |
| Cold water 100L         | A     | Three DWDS locations         | Four seasons (winter, spring, summer, autumn) | Two consecutive sampling weeks (1 and 2) | 23           | 1            | 19 000        | 3 500     | 79 000    | 24           | 0            | 31 000        | 7 000     | 170 000   |
|                         | B     |                              |                                               |                                          | 23           | 1            | 18 000        | 6 900     | 45 000    | 24           | 0            | 26 000        | 9 000     | 56 000    |
|                         | C     | 1: 1-9 km                    |                                               |                                          | 22           | 0            | 25 000        | 3 100     | 86 000    | 21           | 1            | 45 000        | 8 800     | 99 000    |
|                         | D     | 2: 3-26 km                   |                                               |                                          | 24           | 0            | 25 000        | 6 300     | 53 000    | 23           | 1            | 30 000        | 6 500     | 76 000    |
|                         | E     | 3: 11-36 km                  |                                               |                                          | 6            | 19           | 17 000        | 3 200     | 39 000    | 20           | 5            | 22 000        | 3 800     | 50 000    |
| Hot water 100L          | A     | One DWDS location 2: 3-26 km | Four seasons (winter, spring, summer, autumn) | Two consecutive sampling weeks (1 and 2) | 5            | 3            | 19 000        | 3 600     | 54 000    | 5            | 3            | 10 000        | 2 900     | 17 000    |
|                         | B     |                              |                                               |                                          | 8            | 0            | 12 000        | 3 000     | 26 000    | 6            | 2            | 12 000        | 4 400     | 34 000    |
|                         | C     |                              |                                               |                                          | 5            | 3            | 9 300         | 5 200     | 14 000    | 2            | 6            | 5 100         | 4 000     | 6 100     |
|                         | D     |                              |                                               |                                          | 7            | 1            | 9 200         | 3 300     | 29 000    | 3            | 5            | 5 100         | 4 300     | 5 700     |
|                         | E     |                              |                                               |                                          | 1            | 7            | NA            | 6 600     | NA        | 1            | 7            | NA            | 6 000     | NA        |
| Pipeline biofilm        | D     | One location 2: 3-26 km      | Late autumn                                   | Age of biofilm approx. 9 months          | 3            | 0            | 21 000        | 8 200     | 39 000    | 3            | 0            | 24 000        | 16 000    | 30 000    |
|                         | E     |                              |                                               |                                          | 0            | 3            | NA            | NA        | NA        | 0            | 3            | NA            | NA        | NA        |
| Watermeter soft deposit | A     | Two buildings: NA            |                                               | 5.4 - 13.8 years                         | 2            | 0            | 16 000        | 12 000    | 21 000    | 2            | 0            | 14 000        | 13 000    | 15 000    |
|                         | B     | Two buildings: NA            |                                               | 6.8 - 9.9 years                          | 2            | 0            | 7 900         | 3 800     | 12 000    | 2            | 0            | 13 000        | 12 000    | 14 000    |
|                         | C     | Two buildings: NA            |                                               | Late autumn 4.6 - 9 years                | 1            | 1            | NA            | 7 900     | NA        | 2            | 0            | 6 300         | 2 900     | 9 600     |
|                         | D     | One building: NA             |                                               | 7.8 years                                | 1            | 0            | NA            | 38 000    | NA        | 1            | 0            | NA            | 36 000    | NA        |
|                         | E     | Two buildings: NA            |                                               | 15 - 19 years                            | 2            | 1            | 29 000        | 28 000    | 30 000    | 3            | 0            | 29 000        | 11 000    | 44 000    |
| Water-meter water       | A     | Two buildings: NA            |                                               |                                          | 2            | 0            | 15 000        | 9 300     | 20 000    | 1            | 1            | NA            | 45 000    | NA        |
|                         | B     | Two buildings: NA            |                                               | Late autumn One sampling week            | 2            | 0            | 22 000        | 14 000    | 29 000    | 2            | 0            | 17 000        | 15 000    | 19 000    |
|                         | C     | One building: NA             |                                               |                                          | 1            | 0            | NA            | 12 000    | NA        | 1            | 0            | NA            | 12 000    | NA        |
| Sum                     |       |                              |                                               |                                          | 140          | 40           | 2 600 000     |           |           | 146          | 34           | 4 000 000     |           |           |

\**(A-B) = No disinfection, artificial groundwater; C = UV-light + chlorine dioxide, surface water; D = UV-light + monochloramine, surface water; E = UV-light + sodium hypochlorite, groundwater.*

\*\**Winter = January-March 2015, spring = April-May 2015, summer = August-September 2015, autumn = October-December 2015.*

*N = number of samples. Excluded samples contained reads below rarefraction 2873. Average, min and max values calculated from analysed samples. NA = Not applicable.*
