# Supplementary material for: Active eukaryotes in drinking water distribution systems of ground and surface waterworks
Source: PubMed Central journal article supplement (PMC6610866; doi:10.1186/s40168-019-0715-5), 2019-07-03
Supplement: 40168_2019_715_MOESM4_ESM.pdf [file 40168_2019_715_MOESM4_ESM.pdf]

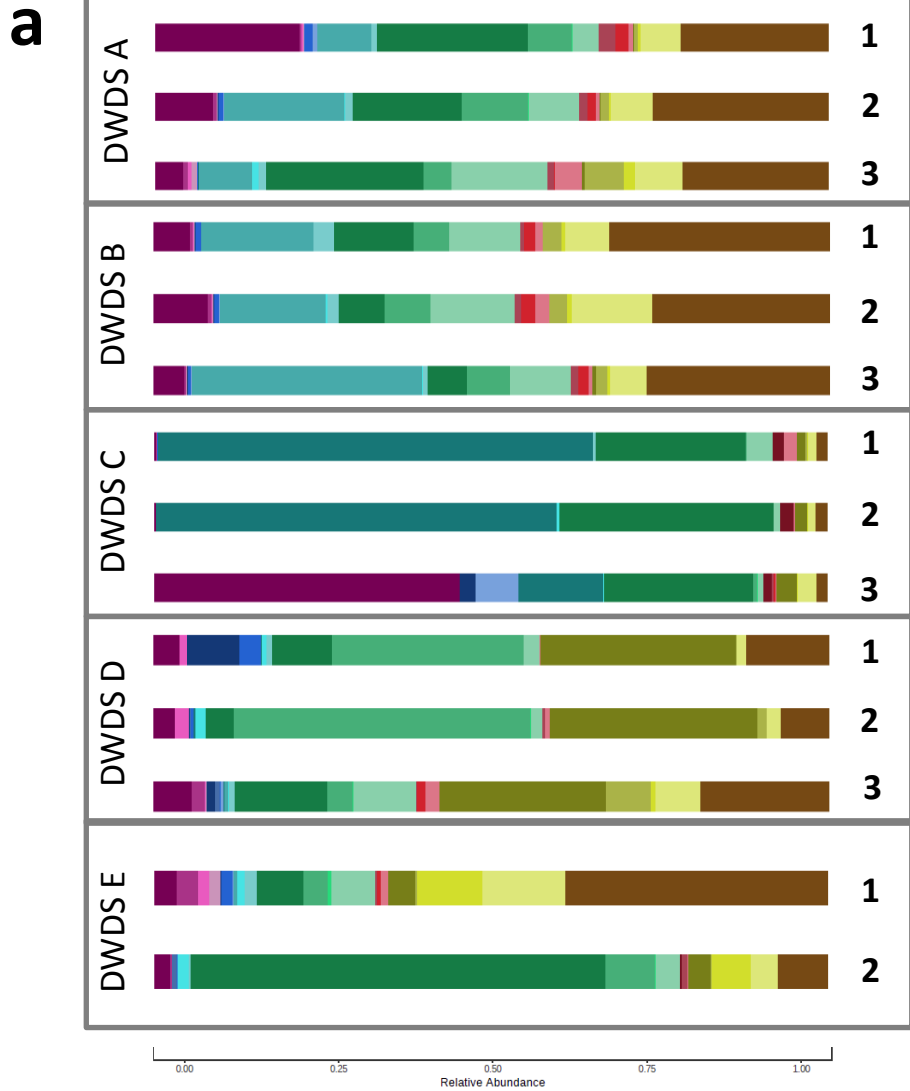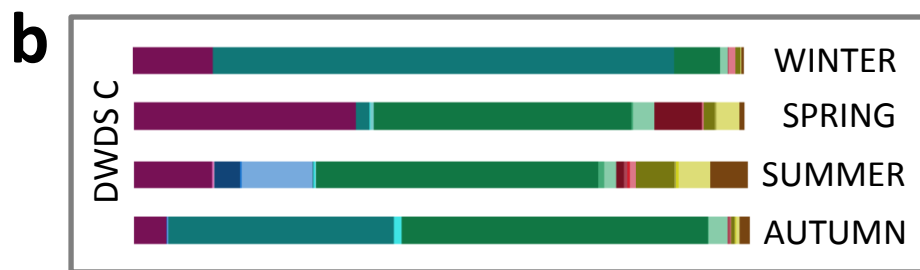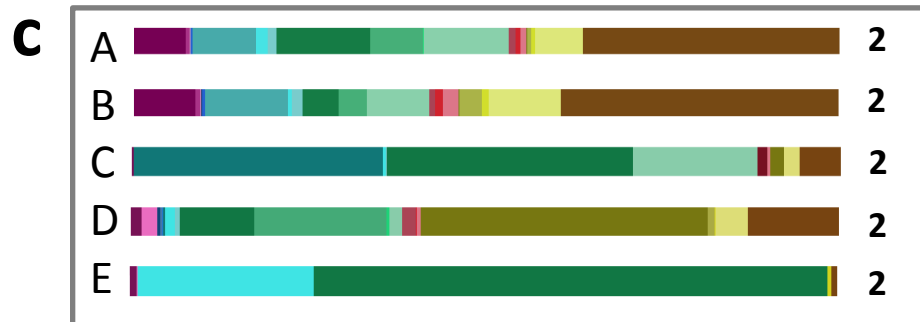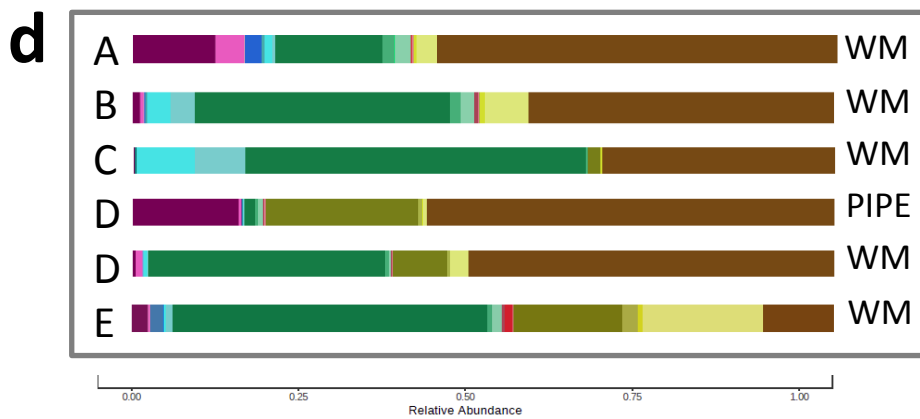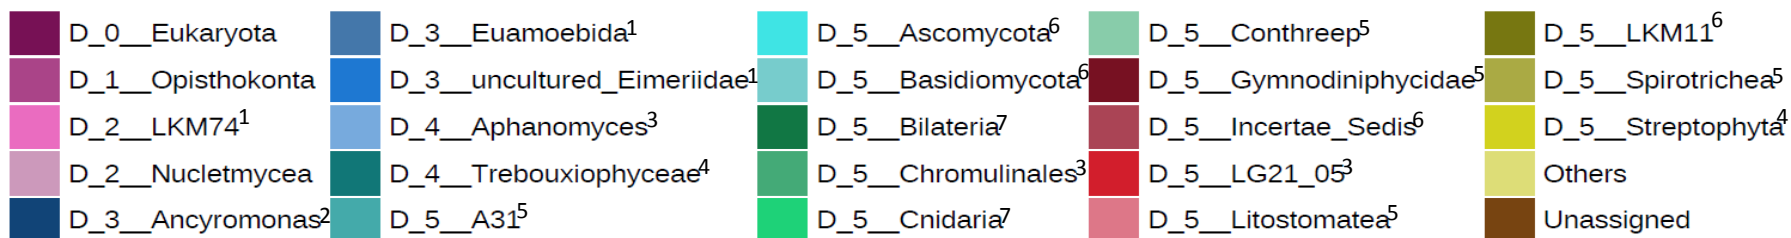

**Fig. S1.** Average relative abundances of the most abundant total (DNA) eukaryotic taxa. See active (RNA) eukaryotic taxa (Fig. 2) for legend.
