# Supplementary material for: Active eukaryotes in drinking water distribution systems of ground and surface waterworks
Source: PubMed Central journal article supplement (PMC6610866; doi:10.1186/s40168-019-0715-5), 2019-07-03
Supplement: 40168_2019_715_MOESM6_ESM.pdf [file 40168_2019_715_MOESM6_ESM.pdf]

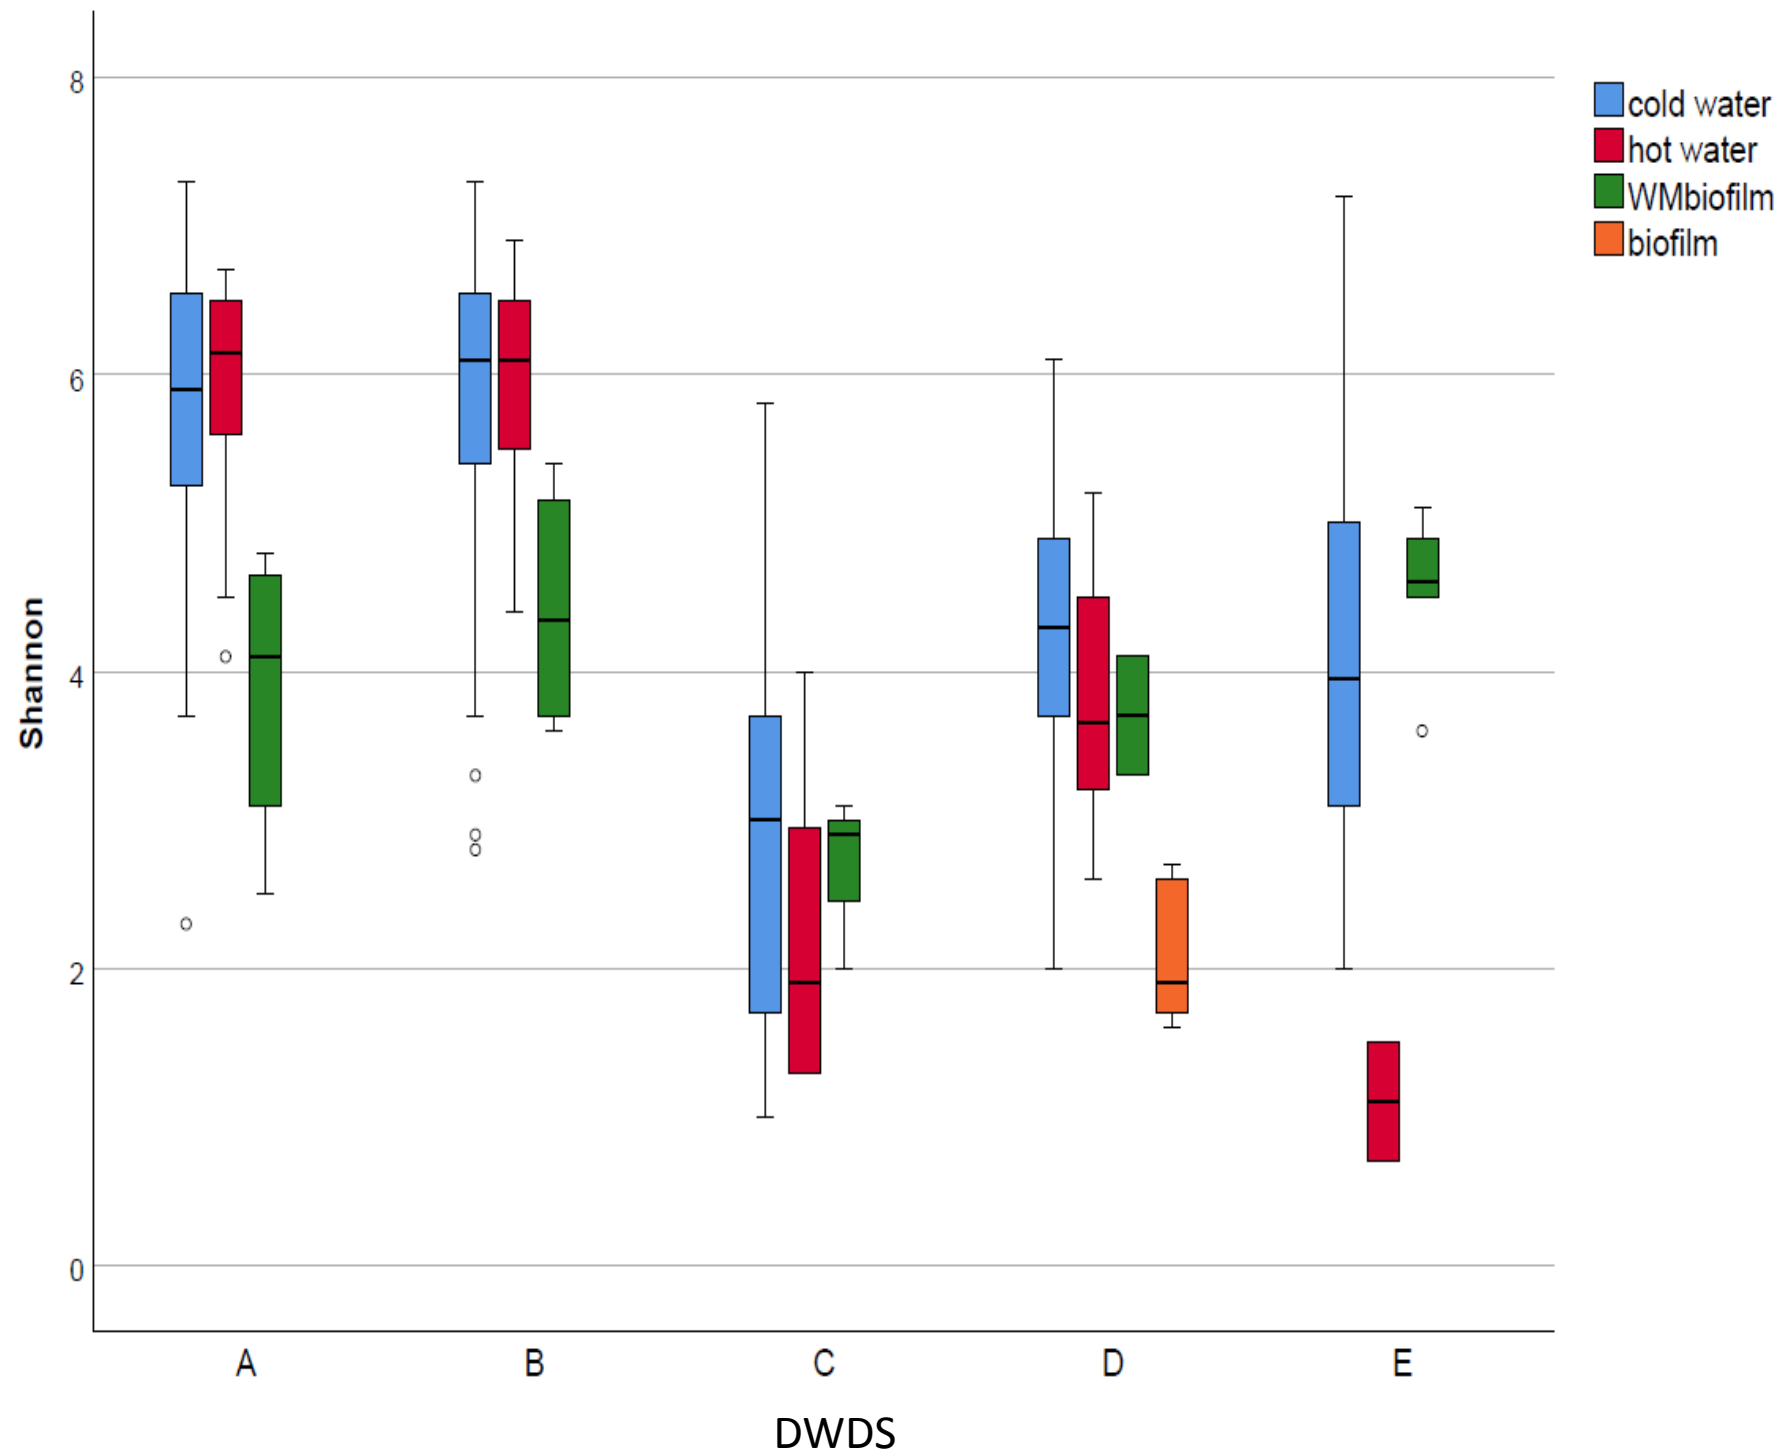

**Fig. S2.** Boxplot of alpha-diversity Shannon values grouped by cold water, hot water and biofilms in each DWDS A–E (DNA + RNA). WMbiofilm = water meter biofilm, biofilm = pipeline biofilm.

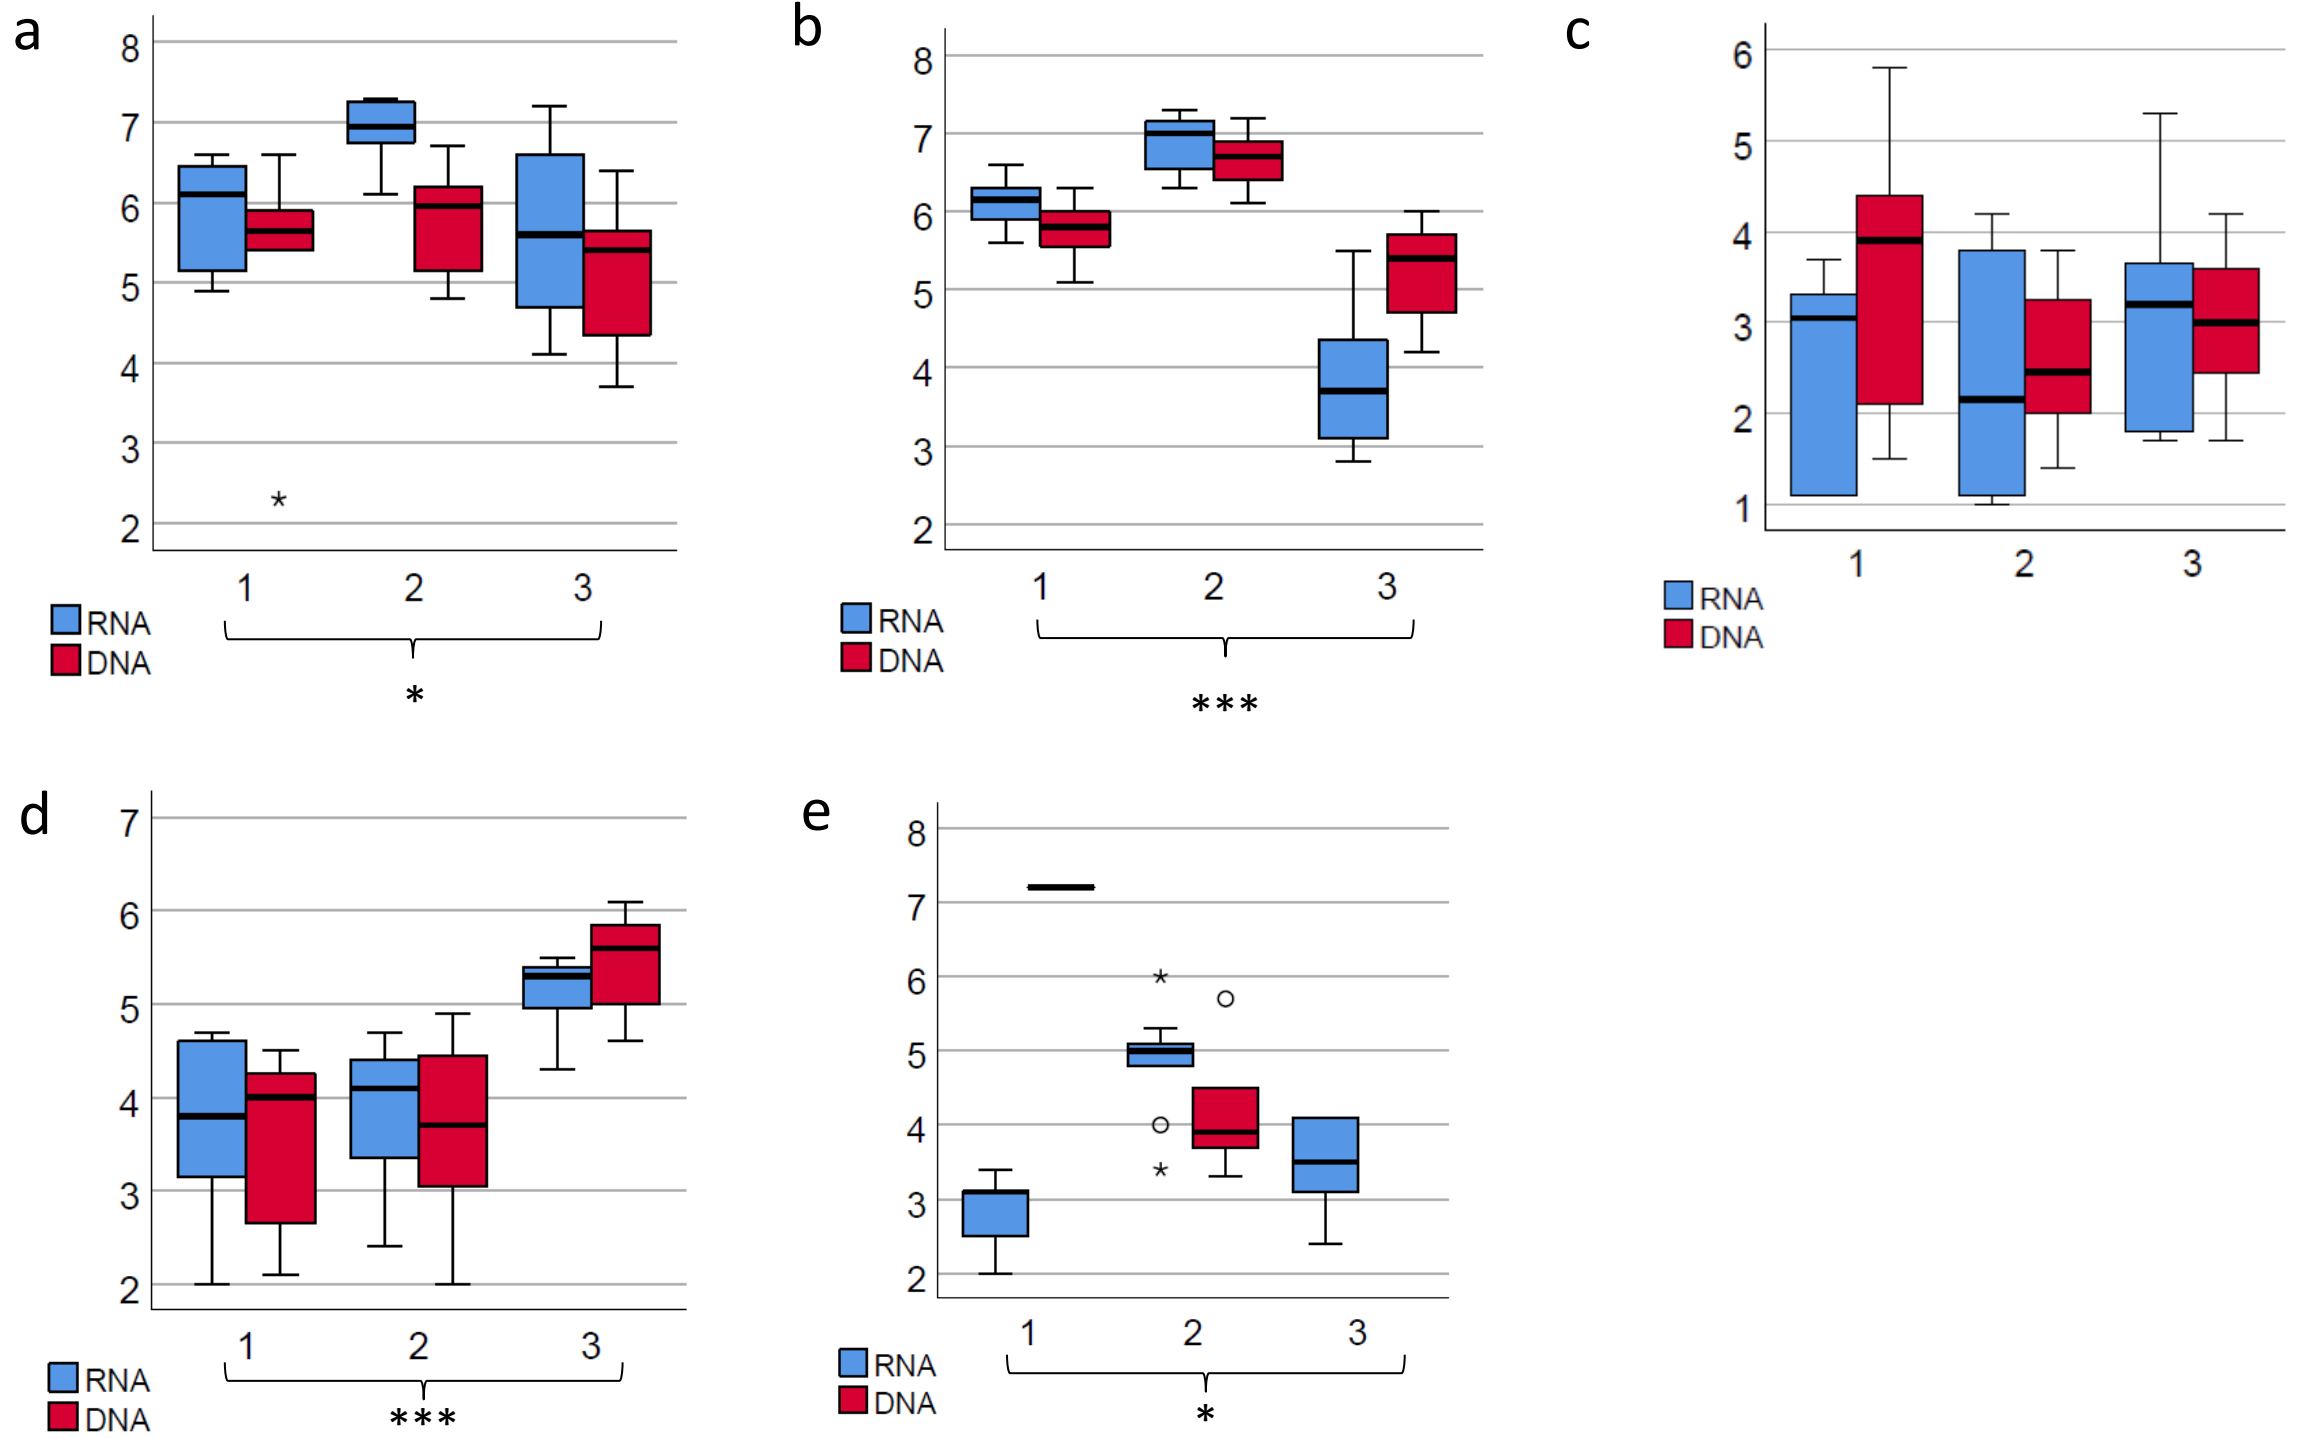

**Fig. S3.** Boxplot of alpha-diversity Shannon values in cold water. a–b) non-disinfected cold water in DWDSs A–B and c–e) disinfected cold water in DWDSs C–E at different locations grouped by RNA/DNA. Statistical significance of the location: \*  $P < 0.05$ ; \*\*  $P < 0.01$ ; \*\*\*  $P < 0.001$ .
