# Supplementary material for: Active eukaryotes in drinking water distribution systems of ground and surface waterworks
Source: PubMed Central journal article supplement (PMC6610866; doi:10.1186/s40168-019-0715-5), 2019-07-03
Supplement: 40168_2019_715_MOESM7_ESM.pdf [file 40168_2019_715_MOESM7_ESM.pdf]

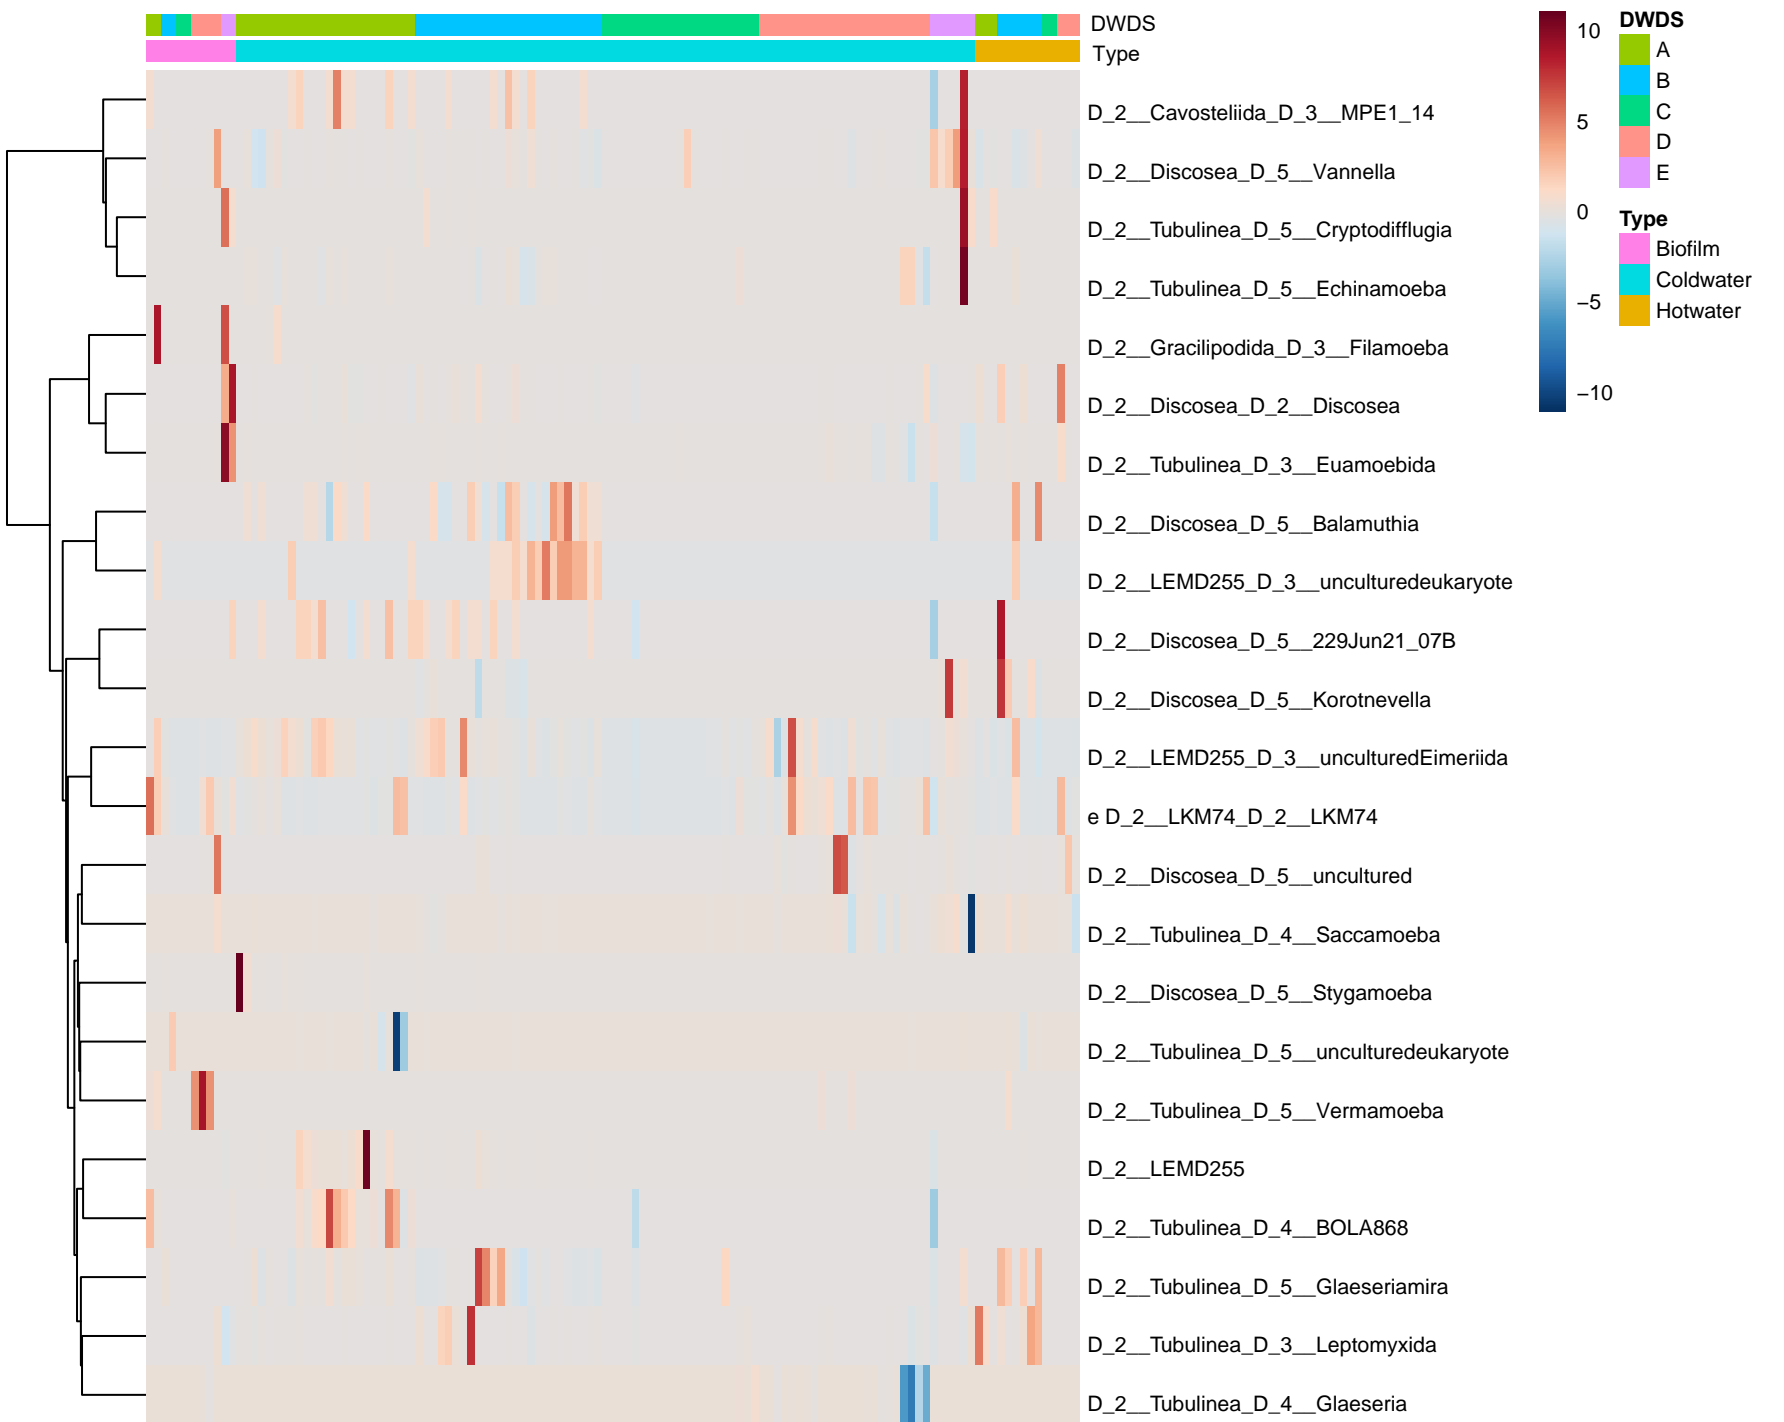

Fig. S4. Heatmap clustering analysis of 66 Amoebozoa OTUs by activity recovery (%).

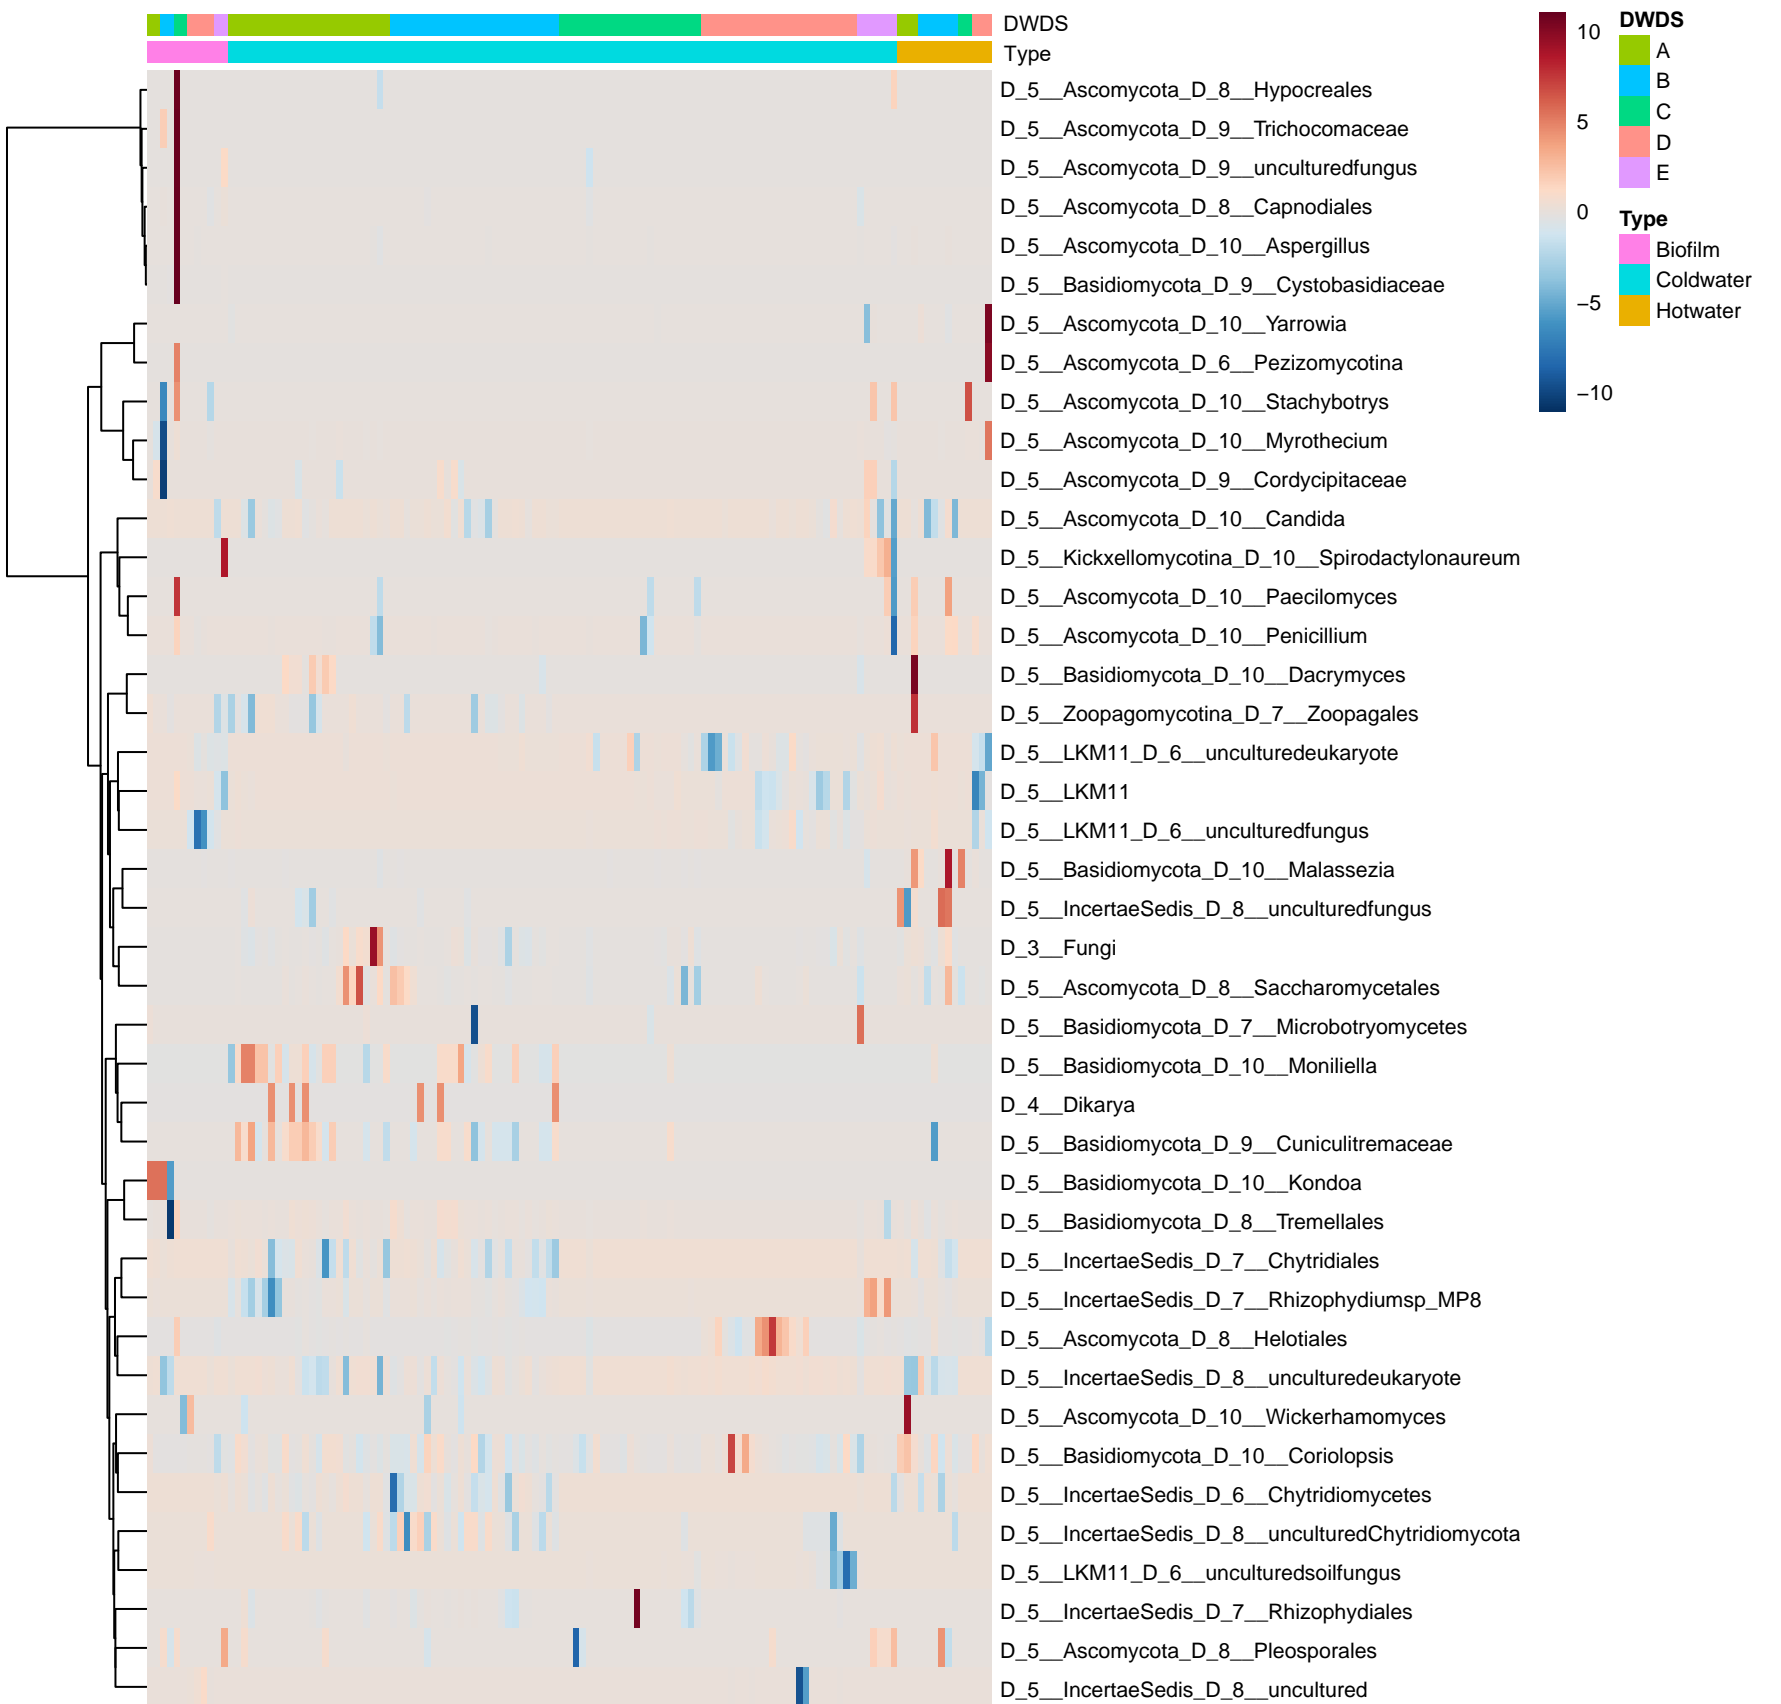

Fig. S5. Heatmap clustering analysis of 139 Fungi OTUs by activity recovery (%).

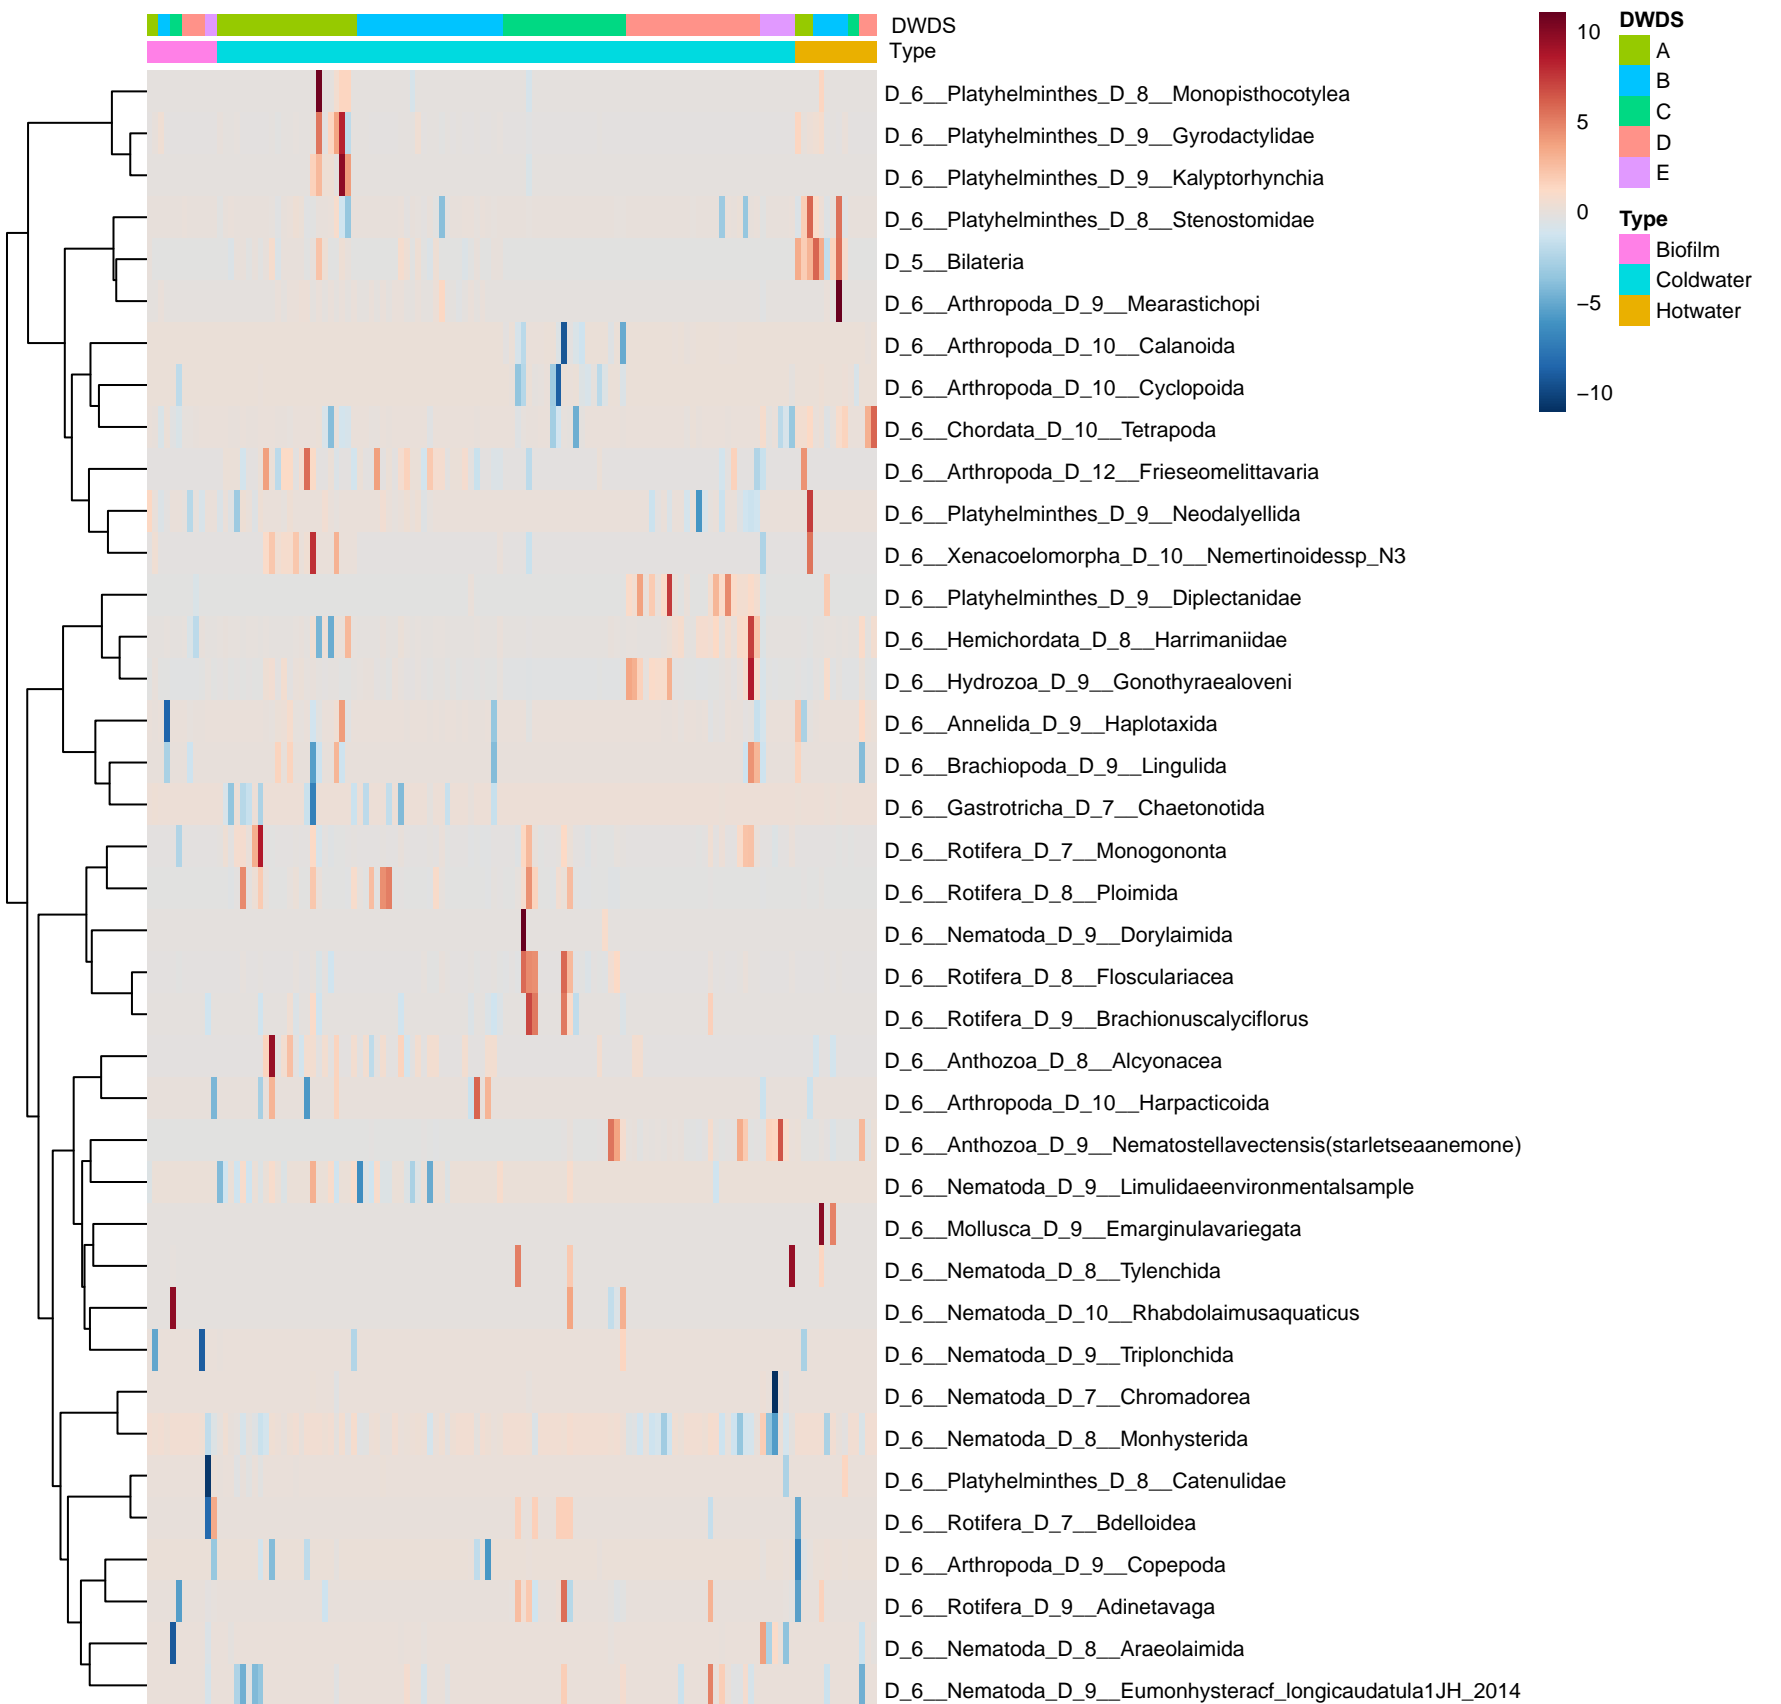

Fig. S6. Heatmap clustering analysis of 110 Metazoa (animal) OTUs by activity recovery (%).

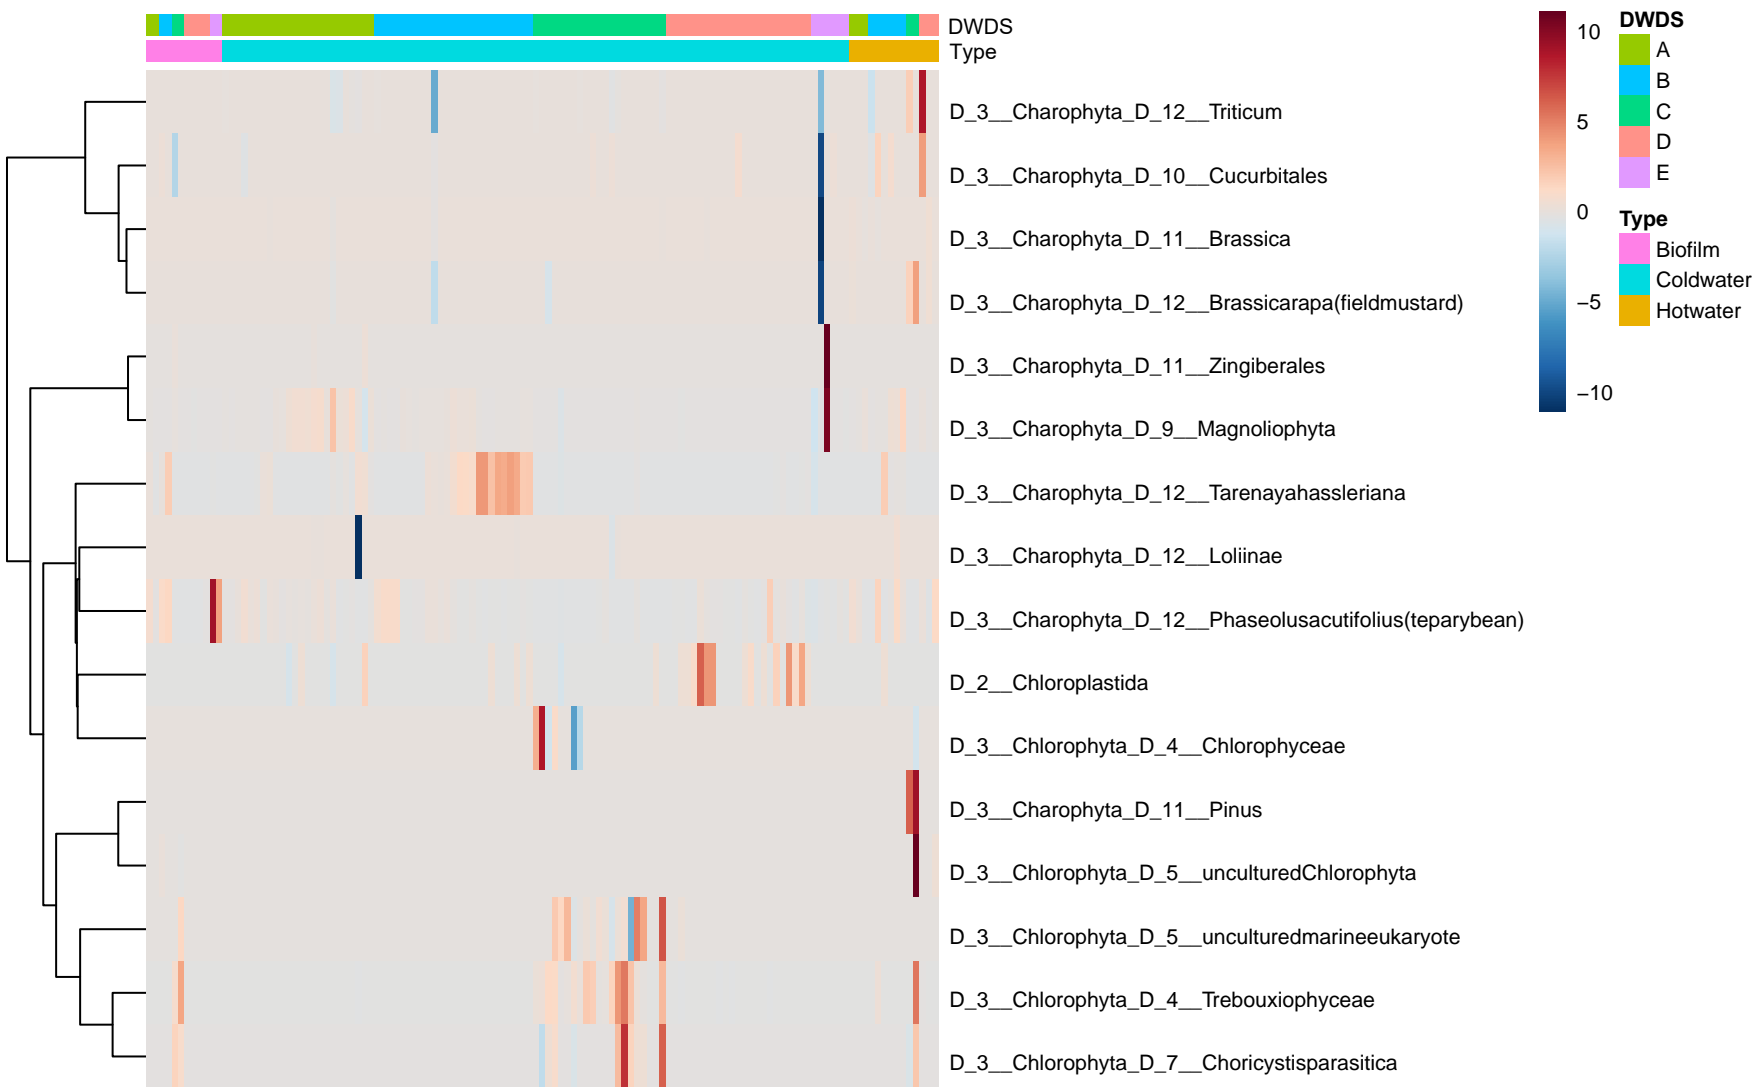

Fig. S7. Heatmap clustering analysis of 84 Chloroplastida OTUs by activity recovery (%).

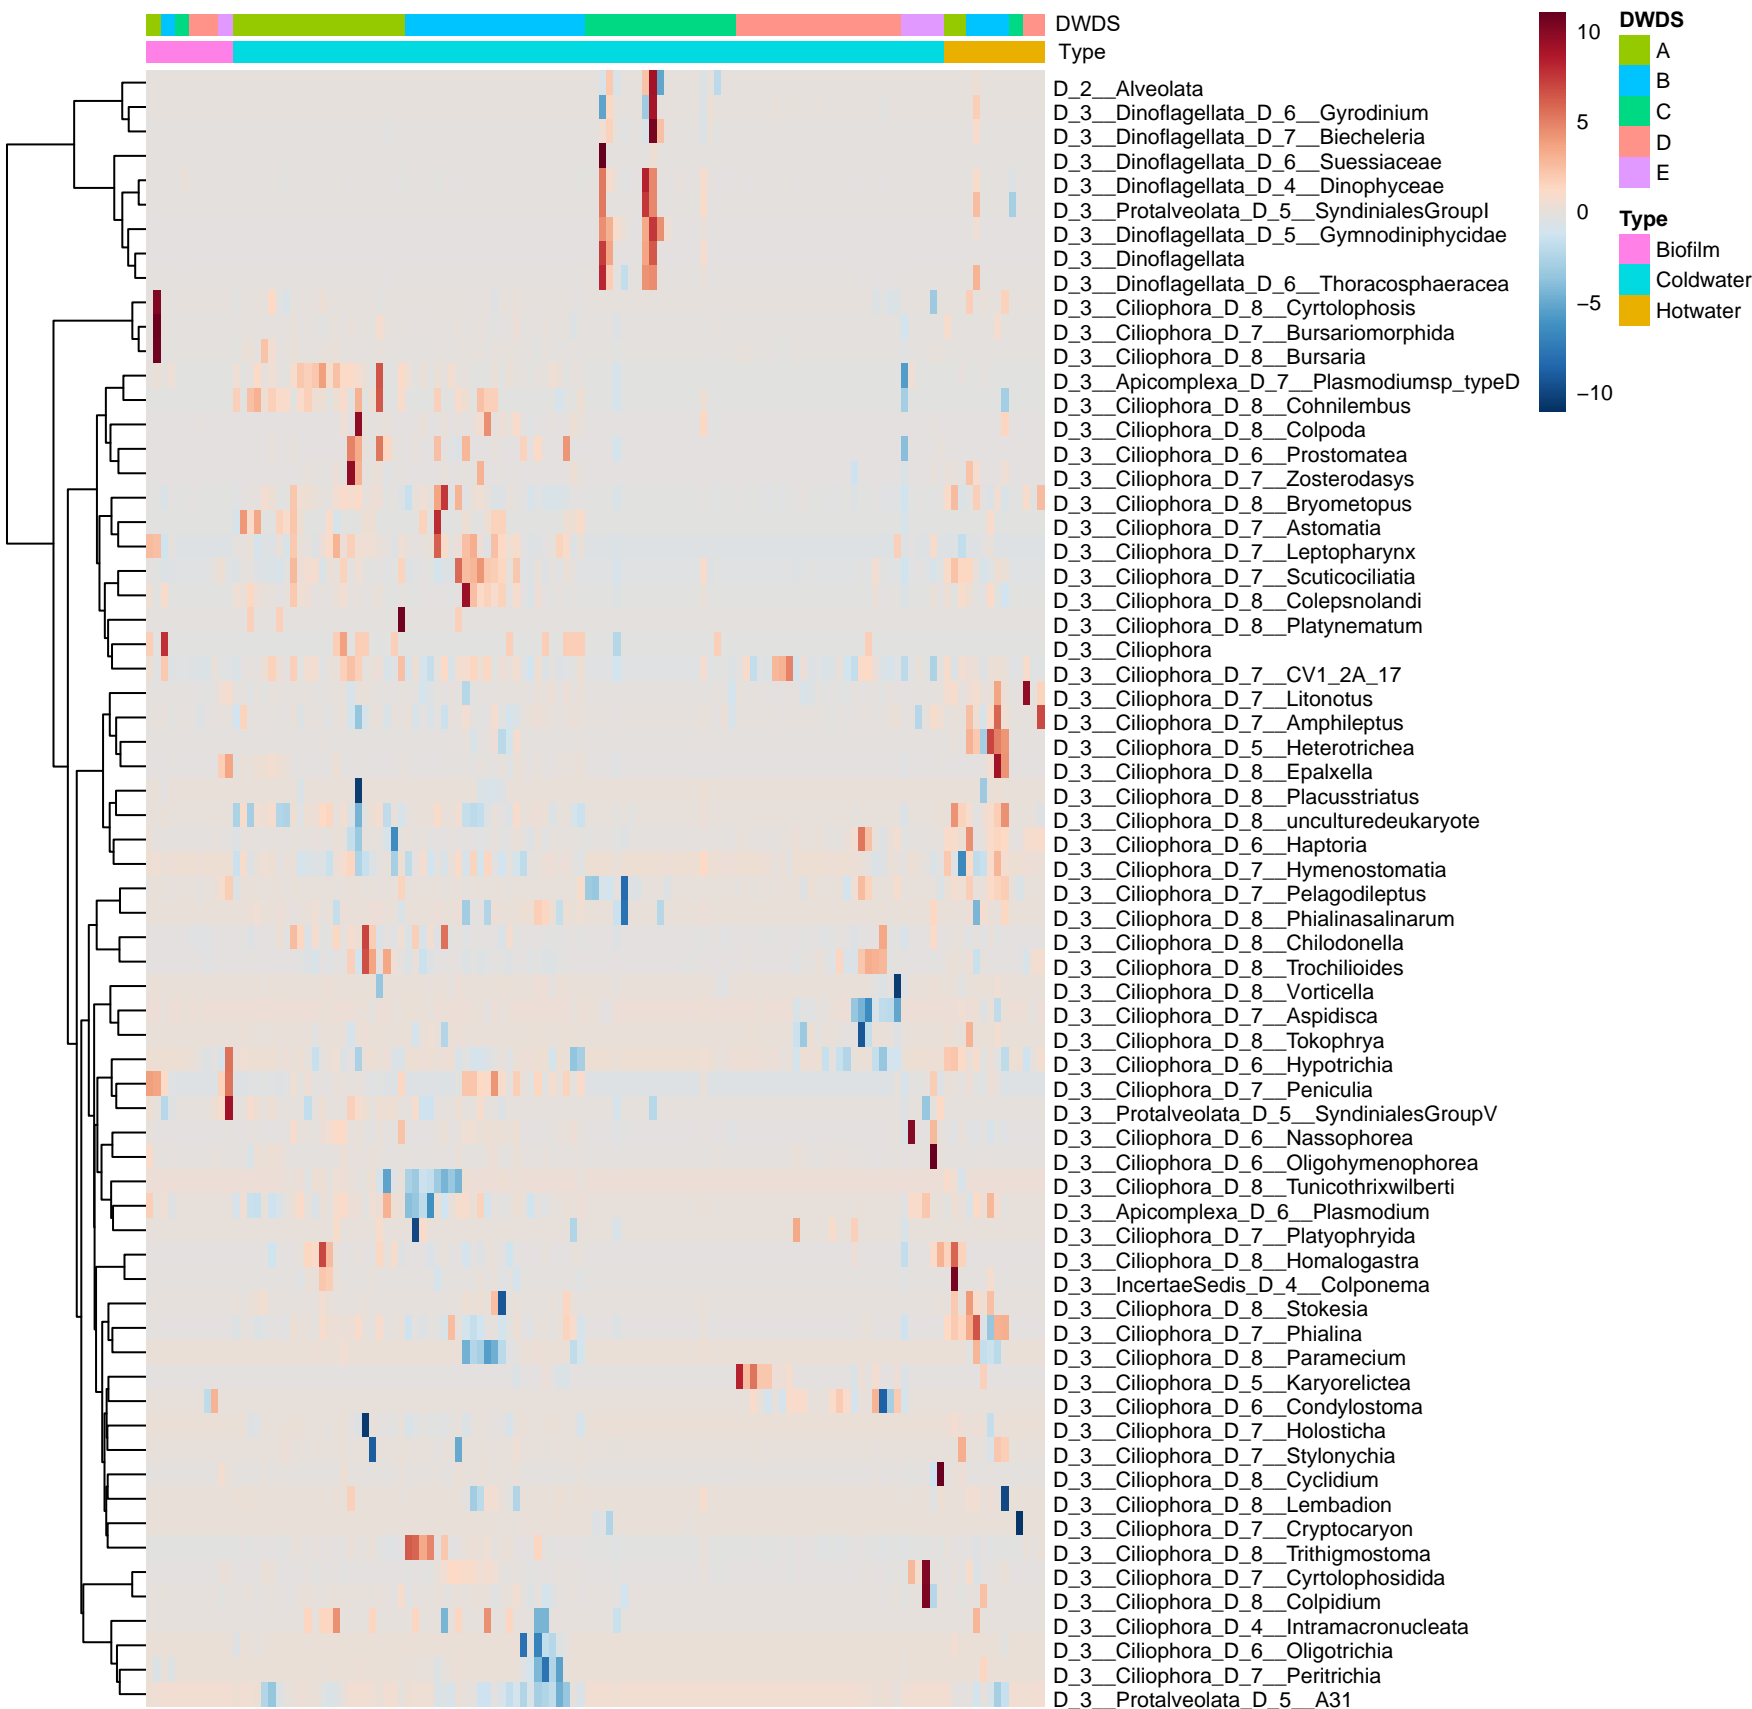

Fig. S8. Heatmap clustering analysis of 234 Alveolata OTUs by activity recovery (%).

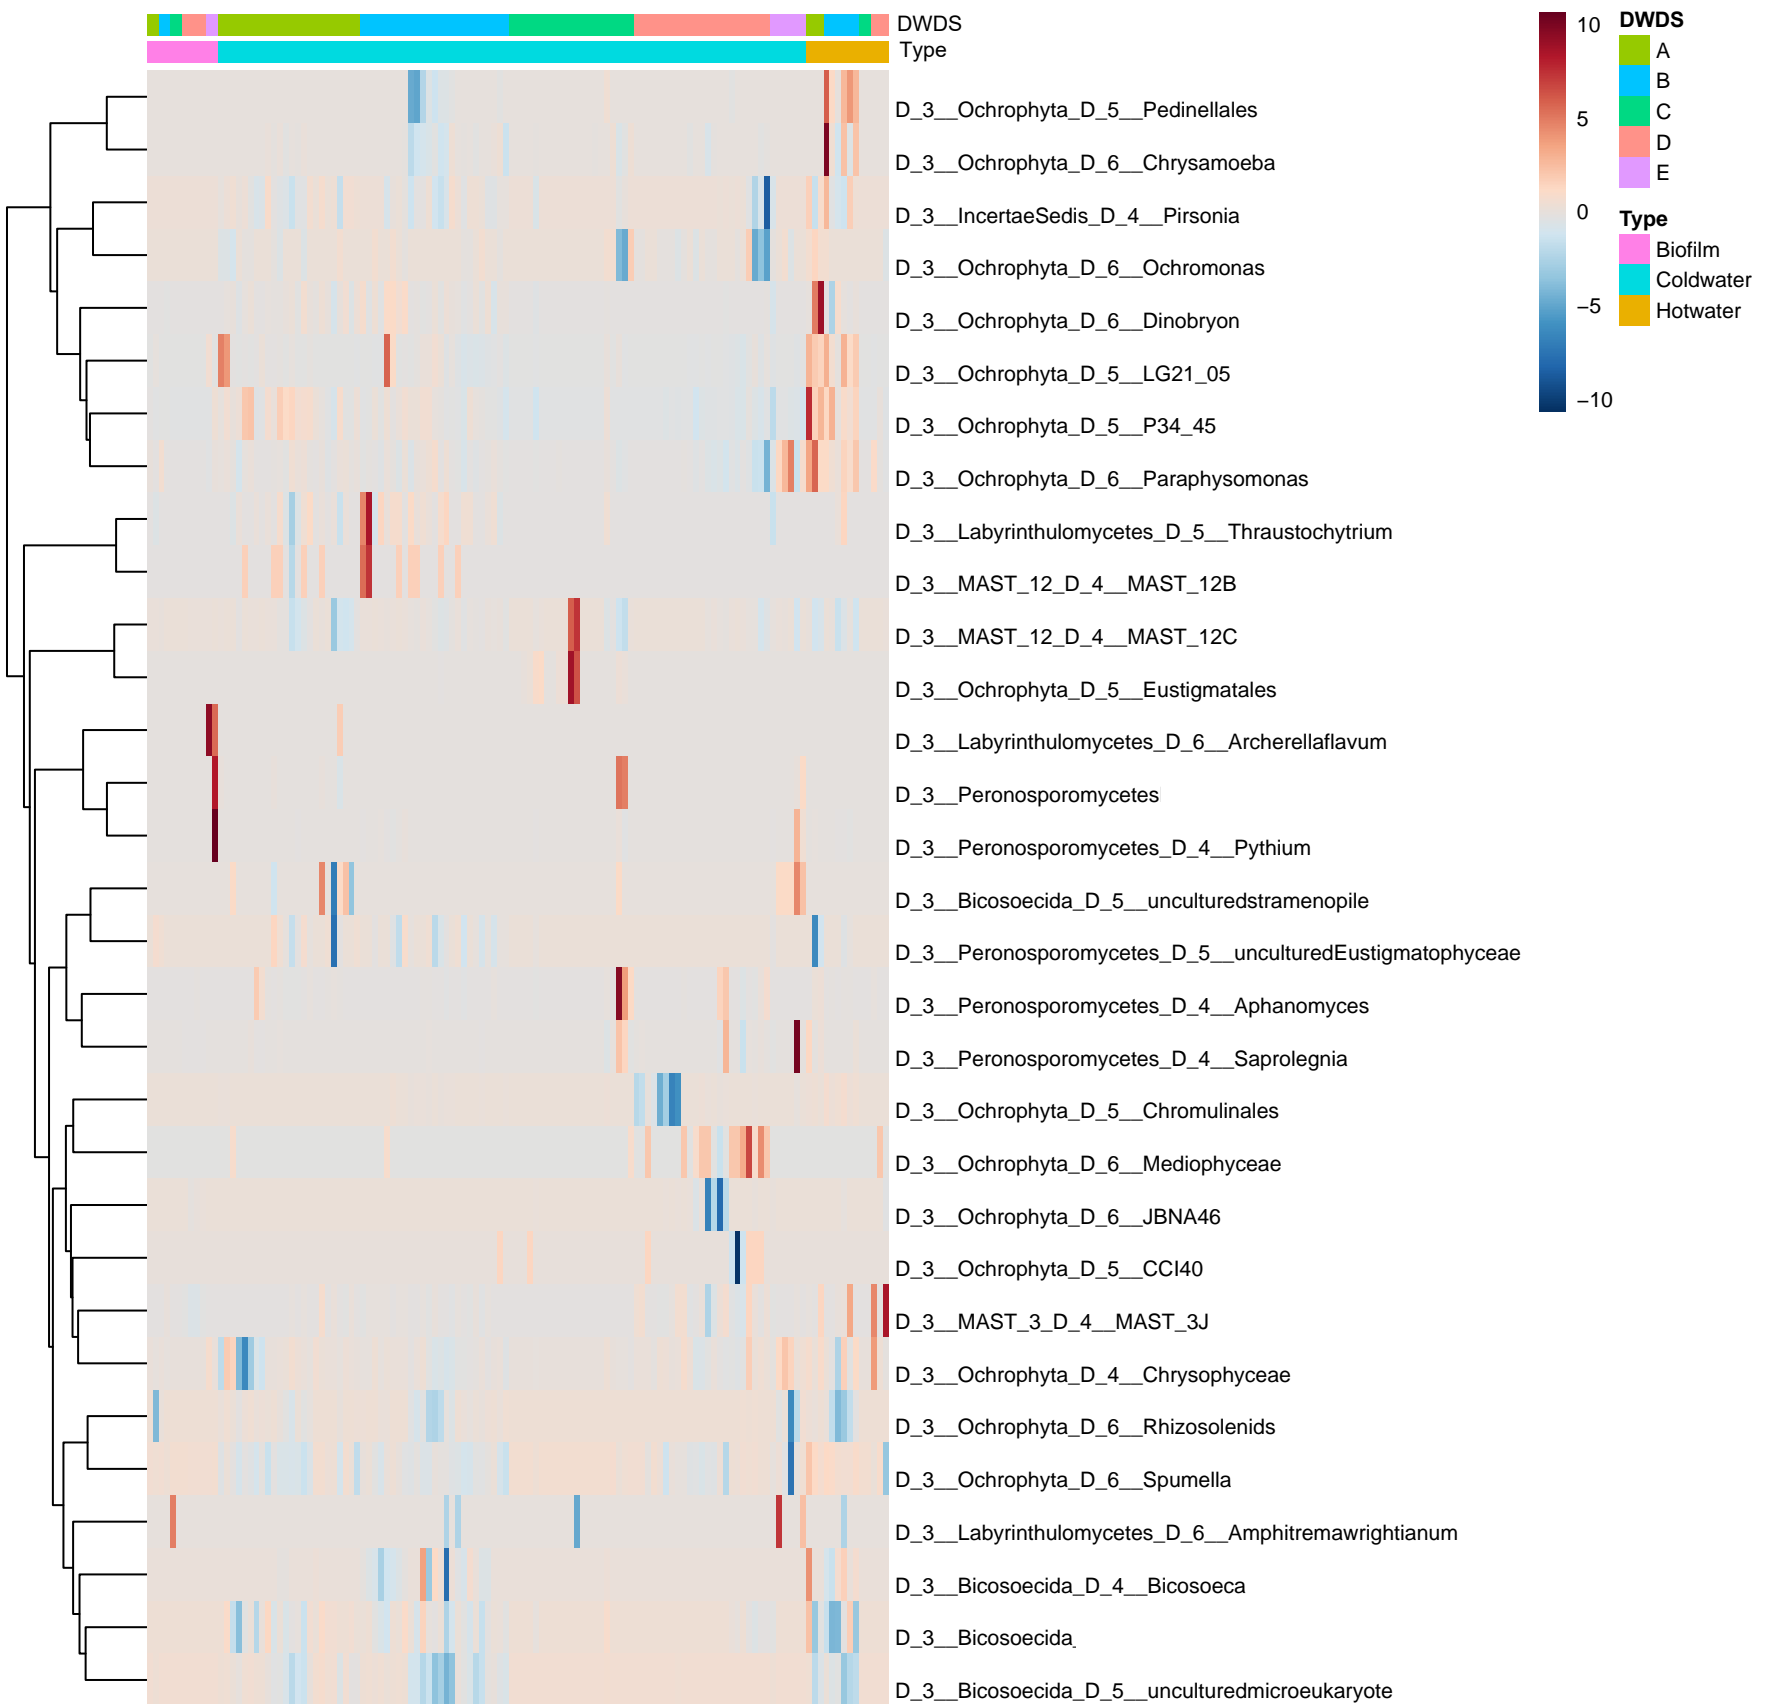

Fig. S9. Heatmap clustering analysis of 148 Stramenopiles OTUs by activity recovery (%).

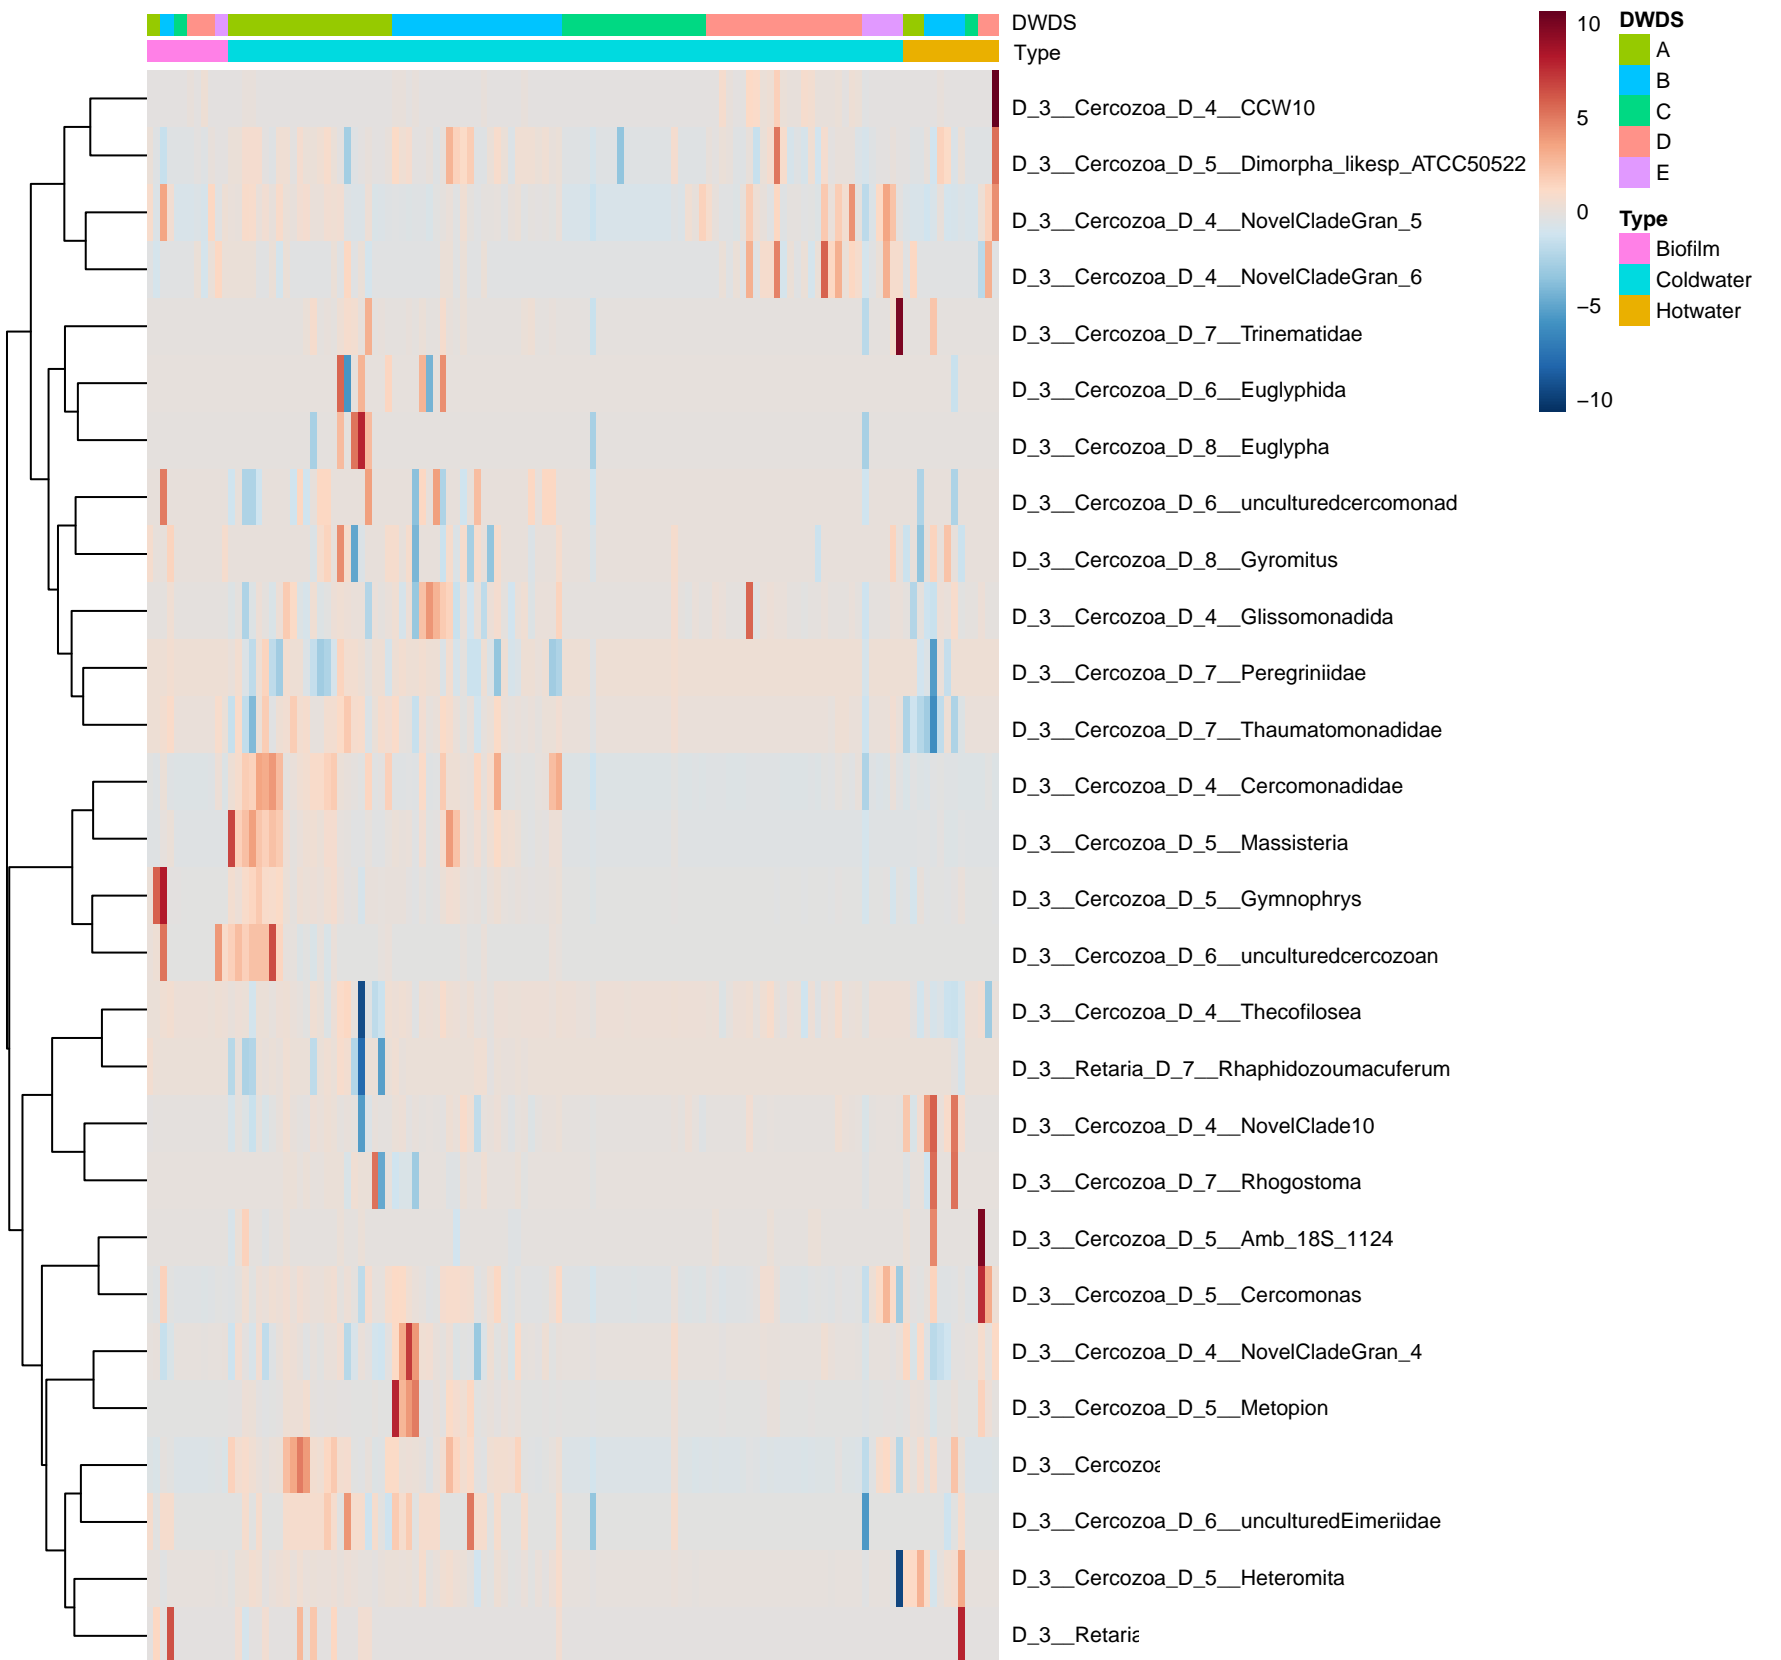

Fig. S10. Heatmap clustering analysis of 127 Rhizaria OTUs by activity recovery (%).
