# Supplementary material for: Active eukaryotes in drinking water distribution systems of ground and surface waterworks
Source: PubMed Central journal article supplement (PMC6610866; doi:10.1186/s40168-019-0715-5), 2019-07-03
Supplement: 40168_2019_715_MOESM8_ESM.pdf [file 40168_2019_715_MOESM8_ESM.pdf]

Table S9. Free-living amoeba and potentially pathogenic eukaryotes in cold drinking water.

|                                    |                                                        | Cold water             |           |           |           |                        |                        |           |           |                        |                           |
|------------------------------------|--------------------------------------------------------|------------------------|-----------|-----------|-----------|------------------------|------------------------|-----------|-----------|------------------------|---------------------------|
|                                    |                                                        | A                      |           | B         |           | C                      |                        | D         |           | E                      |                           |
|                                    |                                                        | DNA                    | RNA       | DNA       | RNA       | DNA                    | RNA                    | DNA       | RNA       | DNA                    | RNA                       |
|                                    |                                                        | (N = 23)               | (N = 24)  | (N = 23)  | (N = 24)  | (N = 22)               | (N = 21)               | (N = 24)  | (N = 23)  | (N = 6)                | (N = 20)                  |
| Free living amoeba                 | <i>Balamuthia</i> (uncultured eukaryote) NCR OTU167741 | 0–8 (4)                | 0–42 (11) | 0–9 (16)  | 0–25 (21) | 0                      | 0–2 (1)                | 0         | 0         | 0–6 (1)                | 0                         |
|                                    | <i>Vermamoeba vermiformis</i> NR OTU494                | 0                      | 0–1 (1)   | 0         | 0         | 0–1 (1)                | 0–1 (1)                | 0         | 0–3 (3)   | 0                      | 0                         |
|                                    | <i>Vannella epipetala</i> NR OTU56                     | 0–66 (13)              | 0–99 (19) | 0–34 (19) | 0–67 (23) | 0–2 (1)                | 0–12 (2)               | 0         | 0         | 0–32 (2)               | 0–1403 <sup>2</sup> (9)   |
|                                    | <i>Vannella</i> EF032800.1.1760                        | 0                      | 0         | 0         | 0         | 0–7 (4)                | 0–276 <sup>2</sup> (6) | 0–27 (10) | 0–20 (10) | 0–2 (2)                | 0–236 <sup>1-3</sup> (17) |
|                                    | <i>Vannella</i> NR OTU156                              | 0                      | 0         | 0         | 0         | 0                      | 0                      | 0         | 0         | 0–16 (2)               | 1–404 <sup>2-3</sup> (20) |
|                                    | <i>Vannella epipetala</i> NCR OTU162079                | 0–11 (11)              | 0–10 (17) | 0–3 (11)  | 0–8 (13)  | 0                      | 0–1 (1)                | 0         | 0         | 0–3 (2)                | 0–100 <sup>2</sup> (9)    |
|                                    | <i>Vannella</i> NCR OTU11860                           | 0                      | 0         | 0         | 0         | 0–1(2)                 | 0–17 (1)               | 0–2 (5)   | 0         | 0–4 (1)                | 0–10 (9)                  |
|                                    | <i>Vannella</i> (uncultured eukaryote) NCR OTU186593   | 0                      | 0         | 0         | 0         | 0                      | 0                      | 0–3 (5)   | 0         | 0                      | 0–1 (1)                   |
| Fungi                              | <i>Aspergillus niger</i> NR OTU1061                    | 0–8 (2)                | 0         | 0–2 (2)   | 0         | 0–3 (2)                | 0                      | 0         | 0         | 0–3 (1)                | 0–11 (5)                  |
|                                    | <i>Aspergillus niger</i> JN256017.1.1705               | 0–2 (1)                | 0         | 0         | 0         | 0                      | 0                      | 0         | 0         | 0–2 (1)                | 0–1 (2)                   |
|                                    | <i>Aspergillus</i> JF719077.1.1233                     | 0                      | 0         | 0         | 0         | 0–1 (1)                | 0                      | 0         | 0         | 0                      | 0                         |
|                                    | <i>Aspergillus niger</i> AY256260.1.1229               | 0                      | 0         | 0         | 0         | 0–1 (1)                | 0                      | 0         | 0         | 0                      | 0–1 (2)                   |
|                                    | <i>Candida</i> NR OTU983                               | 0–30 (16)              | 0–5 (13)  | 0–64 (16) | 0–16 (12) | 0–1 (1)                | 0–7 (1)                | 0–43 (11) | 0–7 (7)   | 0–50 (5)               | 0–214 (10)                |
|                                    | <i>Paecilomyces</i> AB015768.1.1686                    | 0–1 (1)                | 0         | 0         | 0         | 0–2 (3)                | 0                      | 0         | 0         | 0–1 (1)                | 0–3 (2)                   |
|                                    | <i>Stachybotrys chartarum</i> JF797222.1.2154          | 0                      | 0         | 0         | 0         | 0                      | 0                      | 0         | 0         | 0–15 (1)               | 0–2 (3)                   |
|                                    | <i>Alternaria alternata</i> FM178261.1.2018            | 0                      | 0–1 (1)   | 0         | 0         | 0–0 (0)                | 0                      | 0–1 (1)   | 0         | 0–10 (2)               | 0–67 (2)                  |
|                                    | <i>Penicillium</i> EU278606.1.1737                     | 0–501 <sup>3</sup> (6) | 0–10 (7)  | 0–50 (4)  | 0–3 (4)   | 0–1 (3)                | 0–10 (3)               | 0–7 (2)   | 0–77 (5)  | 0–307 <sup>2</sup> (3) | 0–933 <sup>2-3</sup> (9)  |
|                                    | <i>Penicillium</i> (food metagenome) JN624277.1.1430   | 0–5 (3)                | 0         | 0–1 (1)   | 0         | 0–362 <sup>2</sup> (6) | 0                      | 0         | 0–2 (1)   | 0–2 (1)                | 0–8 (3)                   |
|                                    | <i>Penicillium</i> AB293968.1.1585                     | 0–3 (2)                | 0         | 0–1 (1)   | 0         | 0–3 (2)                | 0                      | 0         | 0–1 (1)   | 0                      | 0–3 (4)                   |
|                                    | <i>Penicillium</i> AB245443.1.1745                     | 0–1 (1)                | 0         | 0         | 0         | 0–2 (1)                | 0                      | 0         | 0         | 0                      | 0–1 (1)                   |
|                                    | <i>Penicillium</i> KP027014.1.1579                     | 0–1 (1)                | 0         | 0         | 0         | 0                      | 0–1 (1)                | 0         | 0         | 0–1 (1)                | 0–2 (2)                   |
| <i>Penicillium</i> AF454063.1.1667 | 0                                                      | 0                      | 0         | 0         | 0         | 0                      | 0                      | 0         | 0–1 (1)   | 0–1 (1)                |                           |

Genera not found: POTENTIAL PATHOGENS: *Naegleria*, *Giardia*, *Blastocystis*, *Acanthamoeba*, *Cryptosporidium*, *Babesia*, *Cyclospora*, *Isospora*, *Toxoplasma*, *Entamoeba*; WORMS/CONTAMINATION INDICATORS: *Dientamoeba*, *Enterobius*, *Ascaris*; AMOEBIA HOSTS: *Acanthamoeba*, *Vahlkamphia*; FUNGI WITH POSSIBLE HEALTH EFFECTS: *Exophiala*, *Fusarium*, *Mucor*, *Rhizopus*, *Trichoderma*, *Chaetomium*, *Aureobasidium*, *Bauveria*, *Botrytis*, *Cladosporidium*, *Epicoccum*, *Purporeocillium*, *Sarocladium*.

NR = new reference; NCR = new cleanup reference, N = number of samples.

Table values: minimum and maximum reads per sample, number of positive samples in brackets. Upper index = locations (1–3) marked if >100 reads/sample.

# Table S10. Free-living amoeba and potentially pathogenic eukaryotes in hot water.

|                                    |                                                        | Hot water      |                |                |                |                |                |                |                |                |                |
|------------------------------------|--------------------------------------------------------|----------------|----------------|----------------|----------------|----------------|----------------|----------------|----------------|----------------|----------------|
|                                    |                                                        | A              |                | B              |                | C              |                | D              |                | E              |                |
|                                    |                                                        | DNA<br>(N = 4) | RNA<br>(N = 4) | DNA<br>(N = 8) | RNA<br>(N = 6) | DNA<br>(N = 5) | RNA<br>(N = 2) | DNA<br>(N = 7) | RNA<br>(N = 3) | DNA<br>(N = 1) | RNA<br>(N = 1) |
| Free living amoeba                 | <i>Balamuthia</i> (uncultured eukaryote) NCR OTU167741 | 0–12 (1)       | 0–13 (1)       | 0              | 0–18 (2)       | 0              | 0              | 0              | 0              | 0              | 0              |
|                                    | <i>Vermamoeba vermiformis</i> NR OTU494                | 0              | 0              | 0–2 (2)        | 0–1 (1)        | 0              | 0              | 0              | 0              | 0              | 0              |
|                                    | <i>Vannella epipetala</i> NR OTU56                     | 0–24 (2)       | 0–37 (2)       | 0–74 (3)       | 0–38 (2)       | 0              | 0              | 0              | 0              | 0              | 0              |
|                                    | <i>Vannella</i> EF032800.1.1760                        | 0              | 0              | 0              | 0–1 (1)        | 0–20 (1)       | 0              | 0–6 (2)        | 0              | 0              | 0              |
|                                    | <i>Vannella</i> NR OTU156                              | 0              | 0              | 0              | 0              | 0              | 0              | 0              | 0              | 0              | 0              |
|                                    | <i>Vannella epipetala</i> NCR OTU162079                | 0–5 (1)        | 0–7 (2)        | 0–6 (3)        | 0–2 (1)        | 0              | 0              | 0              | 0              | 0              | 0              |
|                                    | <i>Vannella</i> NCR OTU11860                           | 0              | 0              | 0              | 0              | 0–4 (1)        | 0              | 0–7 (1)        | 0              | 0              | 0              |
|                                    | <i>Vannella</i> (uncultured eukaryote) NCR OTU186593   | 0              | 0              | 0              | 0              | 0              | 0              | 0–3 (1)        | 0              | 0              | 0              |
| Fungi                              | <i>Aspergillus niger</i> NR OTU1061                    | 0–15 (1)       | 0–10 (1)       | 0–1 (2)        | 0–1 (2)        | 0–2 (1)        | 0              | 0–1 (1)        | 0              | 11 (1)         | 40 (1)         |
|                                    | <i>Aspergillus niger</i> JN256017.1.1705               | 0–1 (1)        | 0              | 0              | 0              | 0–1 (1)        | 0              | 0              | 0              | 6 (1)          | 7 (1)          |
|                                    | <i>Aspergillus</i> JF719077.1.1233                     | 0–1 (1)        | 0              | 0              | 0              | 0              | 0              | 0              | 0              | 1 (1)          | 2 (1)          |
|                                    | <i>Aspergillus niger</i> AY256260.1.1229               | 0–1 (1)        | 0              | 0              | 0              | 0              | 0              | 0              | 0              | 1 (1)          | 2 (1)          |
|                                    | <i>Candida</i> NR OTU983                               | 0–17 (3)       | 0–15 (1)       | 0–95 (7)       | 0–9 (1)        | 0              | 0              | 0–4 (1)        | 0              | 0              | 0              |
|                                    | <i>Paecilomyces</i> AB015768.1.1686                    | 0–2 (1)        | 0–2 (1)        | 0              | 0–1 (1)        | 0–1 (1)        | 0              | 0              | 0              | 5 (1)          | 5 (1)          |
|                                    | <i>Stachybotrys chartarum</i> JF797222.1.2154          | 0              | 0              | 0              | 0              | 0              | 0–1 (1)        | 0              | 0              | 1 (1)          | 1 (1)          |
|                                    | <i>Alternaria alternata</i> FM178261.1.2018            | 0              | 0              | 0–0 (0)        | 0              | 0              | 0              | 0              | 0              | 0              | 0              |
|                                    | <i>Penicillium</i> EU278606.1.1737                     | 0–1354 (1)     | 0–82 (2)       | 0–157 (2)      | 0–129 (2)      | 0–229 (1)      | 1–5372 (2)     | 0–128 (1)      | 9–37 (3)       | 1559 (1)       | 0              |
|                                    | <i>Penicillium</i> (food metagenome) JN624277.1.1430   | 0–16 (1)       | 0–2 (1)        | 0–1 (2)        | 0              | 0–1 (1)        | 0–37 (1)       | 0–1 (1)        | 0              | 17 (1)         | 0              |
|                                    | <i>Penicillium</i> AB293968.1.1585                     | 0–1 (1)        | 0              | 0–1 (2)        | 0–1 (1)        | 0–2 (1)        | 0–9 (1)        | 0–1 (1)        | 0              | 4 (1)          | 0              |
|                                    | <i>Penicillium</i> AB245443.1.1745                     | 0–1 (1)        | 0              | 0–1 (1)        | 0              | 0              | 0–4 (1)        | 0              | 0              | 0              | 0              |
| <i>Penicillium</i> KP027014.1.1579 | 0–1 (1)                                                | 0              | 0              | 0              | 0              | 0–7 (1)        | 0              | 0              | 4 (1)          | 0              |                |
| <i>Penicillium</i> AF454063.1.1667 | 0–1 (1)                                                | 0              | 0              | 0–1 (1)        | 0              | 0–5 (1)        | 0–2 (1)        | 0              | 5 (1)          | 0              |                |

Genera not found: POTENTIAL PATHOGENS: *Naegleria*, *Giardia*, *Blastocystis*, *Acanthamoeba*, *Cryptosporidium*, *Babesia*, *Cyclospora*, *Isospora*, *Toxoplasma*, *Entamoeba*; WORMS/CONTAMINATION INDICATORS: *Dientamoeba*, *Enterobius*, *Ascaris*; AMOEBIA HOSTS: *Acanthamoeba*, *Vahlkampfhia*; FUNGI WITH POSSIBLE HEALTH EFFECTS: *Exophiala*, *Fusarium*, *Mucor*, *Rhizopus*, *Trichoderma*, *Chaetomium*, *Aureobasidium*, *Bauveria*, *Botrytis*, *Cladosporidium*, *Epicoccum*, *Purporeocillium*, *Sarocladium*.

NR = new reference; NCR = new cleanup reference, N = number of samples.

Table values: minimum and maximum reads per sample, number of positive samples in brackets. All samples from location 2

Table S11. Free-living amoeba and potentially pathogenic eukaryotes in biofilms.

|                    | Water meter biofilms                                   |                |                |                |                |                |                |                |                |                |                | Pipeline biofilms |           |
|--------------------|--------------------------------------------------------|----------------|----------------|----------------|----------------|----------------|----------------|----------------|----------------|----------------|----------------|-------------------|-----------|
|                    | A                                                      |                | B              |                | C              |                | D              |                | E              |                | D              |                   |           |
|                    | DNA<br>(N = 2)                                         | RNA<br>(N = 2) | DNA<br>(N = 2) | RNA<br>(N = 2) | DNA<br>(N = 1) | RNA<br>(N = 2) | DNA<br>(N = 1) | RNA<br>(N = 1) | DNA<br>(N = 2) | RNA<br>(N = 3) | DNA<br>(N = 3) | RNA<br>(N = 3)    |           |
| Free living amoeba | <i>Balamuthia</i> (uncultured eukaryote) NCR OTU167741 | 0              | 0              | 0              | 0              | 0              | 0              | 0              | 0              | 0              | 0              | 0                 | 0         |
|                    | <i>Vermamoeba vermiformis</i> NR OTU494                | 0–9 (1)        | 2–8 (2)        | 0              | 0              | 0              | 0–1 (1)        | 0              | 0              | 0              | 0              | 2–27 (3)          | 28–50 (3) |
|                    | <i>Vannella epipetala</i> NR OTU56                     | 0              | 0              | 0              | 0–5 (1)        | 0              | 0              | 0              | 0              | 0              | 0              | 0                 | 0         |
|                    | <i>Vannella</i> EF032800.1.1760                        | 0              | 0              | 0              | 0              | 0              | 0              | 70 (1)         | 562 (1)        | 0              | 0              | 0–4 (2)           | 0–19 (2)  |
|                    | <i>Vannella</i> NR OTU156                              | 0              | 0              | 0              | 0              | 0              | 0              | 0              | 0              | 0              | 0              | 0                 | 0         |
|                    | <i>Vannella epipetala</i> NCR OTU162079                | 0              | 0              | 0              | 0              | 0              | 0              | 0              | 0              | 0              | 0              | 0                 | 0         |
|                    | <i>Vannella</i> NCR OTU11860                           | 0              | 0              | 0              | 0              | 0              | 0              | 32 (1)         | 1 (1)          | 0              | 0              | 0                 | 0         |
|                    | <i>Vannella</i> (uncultured eukaryote) NCR OTU186593   | 0              | 0              | 0              | 0              | 0              | 0              | 51 (1)         | 40 (1)         | 0              | 0              | 0                 | 0         |
| Fungi              | <i>Aspergillus niger</i> NR OTU1061                    | 0              | 0              | 0              | 0              | 78 (1)         | 0–341 (1)      | 0              | 0              | 0              | 0              | 0–1 (1)           | 0         |
|                    | <i>Aspergillus niger</i> JN256017.1.1705               | 0              | 0              | 0              | 0              | 0              | 0              | 0              | 0              | 0              | 0              | 0                 | 0         |
|                    | <i>Aspergillus</i> JF719077.1.1233                     | 0              | 0              | 0              | 0              | 1 (1)          | 0–1 (1)        | 0              | 0              | 0              | 0              | 0                 | 0         |
|                    | <i>Aspergillus niger</i> AY256260.1.1229               | 0              | 0              | 0              | 0              | 0              | 0              | 0              | 0              | 0              | 0              | 0                 | 0         |
|                    | <i>Candida</i> NR OTU983                               | 0              | 0              | 0–2 (1)        | 0–3 (1)        | 0              | 0              | 0              | 0              | 0–53 (1)       | 0–2 (1)        | 0                 | 0         |
|                    | <i>Paecilomyces</i> AB015768.1.1686                    | 0              | 0              | 0              | 0              | 1 (1)          | 0–5 (1)        | 0              | 0              | 0              | 0              | 0                 | 0         |
|                    | <i>Stachybotrys chartarum</i> JF797222.1.2154          | 0              | 0              | 0–1 (1)        | 0              | 2 (1)          | 0–4 (1)        | 3 (1)          | 0              | 0              | 0              | 0                 | 0         |
|                    | <i>Alternaria alternata</i> FM178261.1.2018            | 0              | 0              | 0              | 0              | 0              | 0              | 1 (1)          | 0              | 0              | 0              | 0                 | 0         |
|                    | <i>Penicillium</i> EU278606.1.1737                     | 0              | 1–416 (2)      | 0              | 0–1 (1)        | 226 (1)        | 9–73 (2)       | 11 (1)         | 8 (1)          | 2–9 (2)        | 1–8 (2)        | 21–42 (3)         | 0–2 (1)   |
|                    | <i>Penicillium</i> (food metagenome) JN624277.1.1430   | 0              | 0–6 (1)        | 0              | 0              | 4 (1)          | 0              | 1 (1)          | 0              | 0              | 0              | 0                 | 0         |
|                    | <i>Penicillium</i> AB293968.1.1585                     | 0              | 0–2 (1)        | 0              | 0              | 1 (1)          | 0              | 0              | 0              | 0              | 0              | 0                 | 0         |
|                    | <i>Penicillium</i> AB245443.1.1745                     | 0              | 0–3 (1)        | 0              | 0              | 0              | 0              | 0              | 0              | 0              | 0              | 0                 | 0         |
|                    | <i>Penicillium</i> KP027014.1.1579                     | 0              | 0              | 0              | 0              | 0              | 0              | 0              | 0              | 0              | 0              | 0                 | 0         |
|                    | <i>Penicillium</i> AF454063.1.1667                     | 0              | 0–1 (1)        | 0              | 0              | 0              | 0              | 0              | 0              | 0              | 0              | 0                 | 0         |

Genera not found: POTENTIAL PATHOGENS: *Naegleria*, *Giardia*, *Blastocystis*, *Acanthamoeba*, *Cryptosporidium*, *Babesia*, *Cyclospora*, *Isospora*, *Toxoplasma*, *Entamoeba*; WORMS/CONTAMINATION INDICATORS: *Dientamoeba*, *Enterobius*, *Ascaris*; AMOEBAE HOSTS: *Acanthamoeba*, *Vahlkampfhia*; FUNGI WITH POSSIBLE HEALTH EFFECTS: *Exophiala*, *Fusarium*, *Mucor*, *Rhizopus*, *Trichoderma*, *Chaetomium*, *Aureobasidium*, *Bauveria*, *Botrytis*, *Cladosporidium*, *Epicoccum*, *Purporeocillium*, *Sarocladium*.

NR = new reference; NCR = new cleanup reference, N = number of samples.

Table values: minimum and maximum reads per sample, number of positive samples in brackets.
