# Supplementary material for: Active eukaryotes in drinking water distribution systems of ground and surface waterworks
Source: Springer Nature journal article supplement (doi:10.1186/s40168-019-0715-5), 2019-07-03

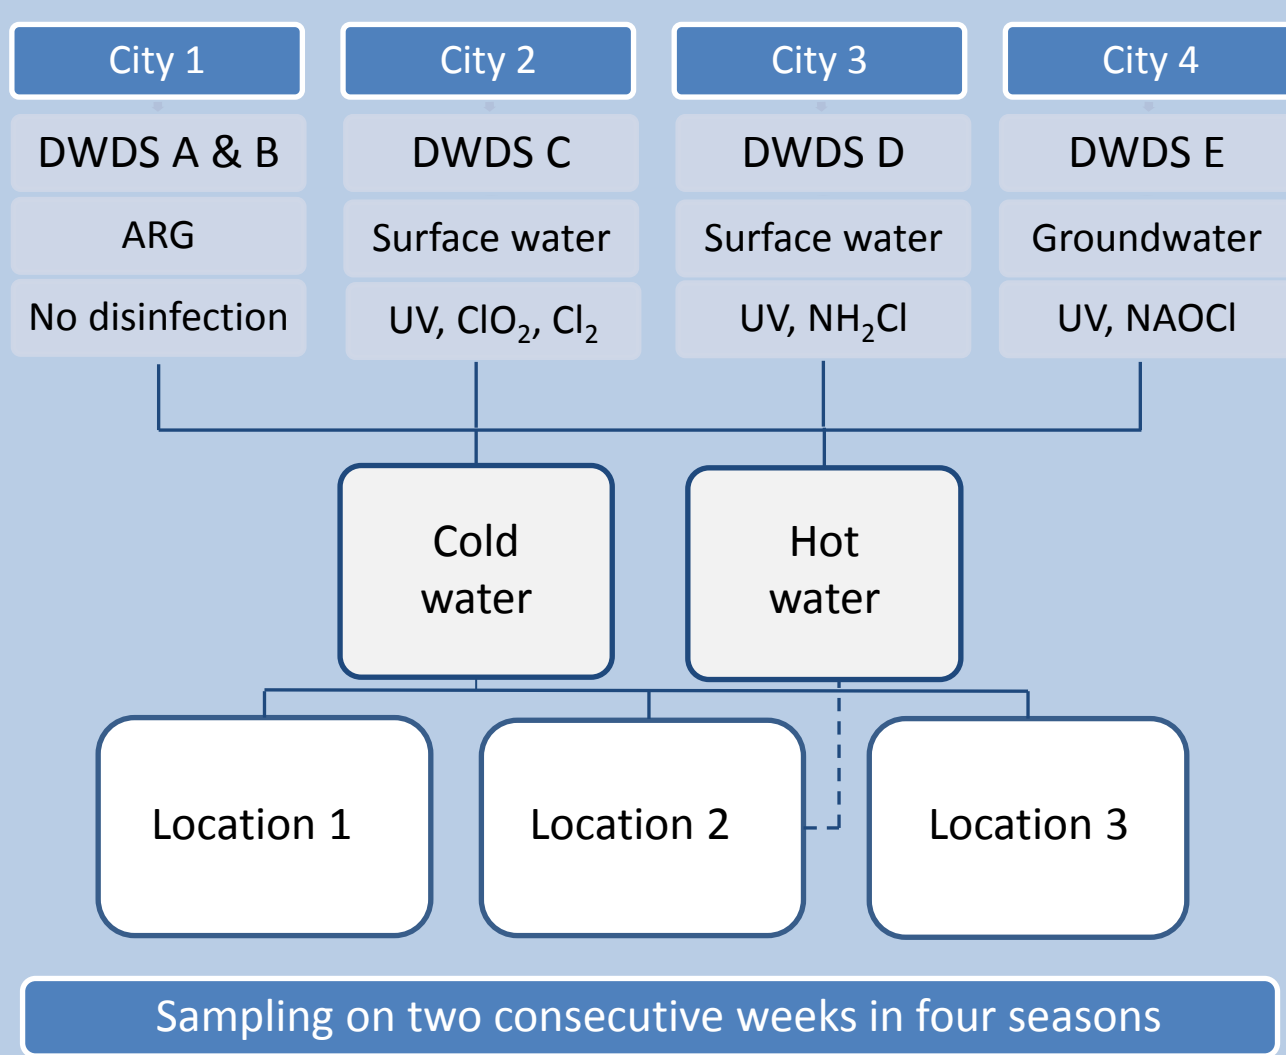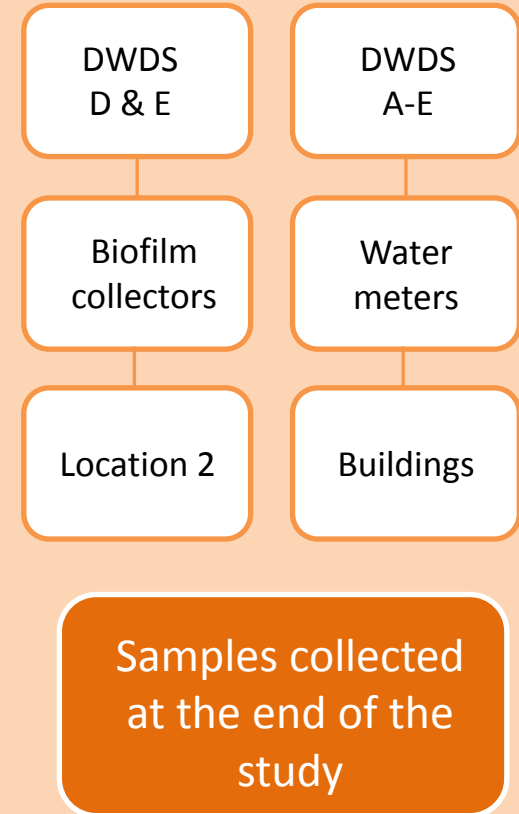

Supplement: MOESM1 [file 40168_2019_715_MOESM1_ESM.pdf]
